# Supplementary material for: Novel QTL for Low Seed Cadmium Accumulation in Soybean
Source: MDPI journal article supplement (doi:10.3390/plants11091146), 2022-04-24
Supplement: s1 [file s1]

# Novel QTL for Low Seed Cadmium Accumulation in Soybean

Nour Nissan<sup>1,2</sup>, Julia Hooker<sup>1,2</sup>, Arezo Pattang<sup>1,2</sup>, Martin Charette<sup>1</sup>, Malcolm Morrison<sup>1</sup>, Kangfu Yu<sup>3</sup>, Anfu Hou<sup>4</sup>, Ashkan Golshani<sup>2</sup>, Stephen J. Molnar<sup>1</sup>, Elroy R. Cober<sup>1</sup>, Bahram Samanfar<sup>1,2</sup>

<sup>1</sup> Agriculture and Agri-Food Canada, Ottawa Research and Development Centre, Ottawa, ON, Canada.

<sup>2</sup> Department of Biology and Ottawa Institute of Systems Biology, Carleton University, Ottawa, ON, Canada.

<sup>3</sup> Agriculture and Agri-Food Canada, Harrow Research and Development Centre, Harrow, ON, Canada.

<sup>4</sup> Agriculture and Agri-Food Canada, Morden Research and Development Centre, Morden, MB, Canada.

\* Correspondence: bahram.samanfar@agr.gc.ca

**Supplementary Table 1.** Sequence of CAPS and dCAPS marker pairs used for the major Cd gene (*Cda1*), in addition to the restriction enzymes used for dCAPS digestion. The digested fragments correspond to either high or low Cd accumulators.

| CAPs                    |                                                               |         |                                                                        |
|-------------------------|---------------------------------------------------------------|---------|------------------------------------------------------------------------|
| Names                   | Sequence                                                      | Enzyme  | Fragment                                                               |
| A SNP R<br>GmHMA3-4F    | AAGAGCTGAACCTGATATTt<br>CCTGCAGAAAAGGCAGTGAT                  | -       | A band at about 147 bp indicates the presence of A SNP for High Cd [C] |
| G SNP R<br>GmHMA3-4F    | AGAGCTGAACCTGATATTC<br>CCTGCAGAAAAGGCAGTGAT                   | -       | A band at about 147 bp indicates the presence of G SNP for Low Cd [C]  |
| A SNP F<br>MC4R         | GACATCGGTATCTCAATGGa<br>AGTCAACACAGCAAGCCAGA                  | -       | A band at about 220 bp indicates the presence of A SNP for High Cd [C] |
| G SNP F<br>MC4R         | GACATCGGTATCTCAATGGG<br>AGTCAACACAGCAAGCCAGA                  | -       | A band at about 220 bp indicates the presence of G SNP for Low Cd [C]  |
| dCAPs                   |                                                               |         |                                                                        |
| dCAP MC1 F<br>dCAP MC4R | CCTGCATTAGCCACAGCTGACATCGGTATCTCAATCG<br>AGTCAACACAGCAAGCCAGA | TaqI    | 2 bands indicate low Cd [C]                                            |
| dCAP MC2 F<br>dCAP MC4R | CCTGCATTAGCCACAGCTGACATCGGTATCTCAATCG<br>AGTCAACACAGCAAGCCAGA | HpyI88I | Low band is Low Cd and High band is High Cd [C]                        |
| GmHMA3-4F<br>dCAP MC3 R | CCTGCAGAAAAGGCAGTGAT<br>GCAAGAGCTGAACCTGAGATT                 | HinfI   | Low band is Low Cd and High band is High Cd [C]                        |
