# Supplementary material for: Novel QTL for Low Seed Cadmium Accumulation in Soybean
Source: Plants (Basel). 2022 Apr 24;11(9):1146. doi: 10.3390/plants11091146 (PMC9102923; doi:10.3390/plants11091146)
Supplement: Supplementary file 1 [file plants-11-01146-s001.zip]

Archive with 4 entries (4 files):
- Supplemental File S1.xlsm
- Supplemental File S2.xlsm
- Supplementary File S3.xlsx
- Supplementary Table S1.pdf
