# Supplementary material for: Novel QTL for Low Seed Cadmium Accumulation in Soybean
Source: Plants (Basel). 2022 Apr 24;11(9):1146. doi: 10.3390/plants11091146 (PMC9102923; doi:10.3390/plants11091146)
Supplement: Supplementary file 1 [file plants-11-01146-s001.zip › Supplemental File S1.xlsm]

## Sheet: soybase_genome_annotation
Novel QTL for Low Seed Cadmium Concentration in Soybean Nour Nissan1,2, Julia Hooker1,2, Arezo Pattang1,2, Martin Charette1, Malcolm Morrison1, Kangfu Yu3, Anfu Hou4, Ashkan Golshani2, Stephen J. Molnar1, Elroy R. Cober1, Bahram Samanfar1,2* 1 Agriculture and Agri-Food Canada, Ottawa Research and Development Centre, Ottawa, ON, Canada. 2Department of Biology and Ottawa Institute of Systems Biolog…
Supplementary Table 1. Soybase Genome and Gene Ontology annotations for genes within Satt218 SSR marker including highlights for potential candidates. (1) GlymaID from Gmax version 2.0. (2) Top Uniref100 BLASTP Hit. Match determined via BLASTP of Gmax2.0 primary proteins against Uniref100 (version 03/27/2014). (3) Top Descriptive Uniref100 BLASTP Hit. The BLAST report generated above (2) was pars…
Gmax 2.0 Primary Protein ID (1)	Chromosome	Start	End	Top Uniref100 BLASTP Hit (2)	Top Descriptive Uniref100 BLASTP Hit (3)	Top Arabidopsis (TAIR10) BLASTP Hit (4)	Gene Ontology Biological Process Descriptions (5)	Gene Ontology Molecular Function Descriptions (6)	PFAM_Descriptions (7)
Glyma.13G304400	Gm13	40133247	40135587	UniRef100_C6TMP1 Putative uncharacterized protein n=1 Tax=Glycine max RepID=C6TMP1_SOYBN	UniRef100_T2DP41 Xyloglucan endotransglucosylase/ hydrolase protein 9-like protein n=1 Tax=Phaseolus vulgaris RepID=T2DP41_PHAVU	AT4G03210.1|Symbols:XTH9|xyloglucan endotransglucosylase/hydrolase 9|chr4:1416019-1417197 FORWARD LENGTH=290	carbohydrate metabolic process; cellular glucan metabolic process; regulation of meristem growth	hydrolase activity, acting on glycosyl bonds; hydrolase activity, hydrolyzing O-glycosyl compounds; xyloglucan:xyloglucosyl transferase activity	Xyloglucan endo-transglycosylase (XET) C-terminus; Glycosyl hydrolases family 16
Glyma.13G304500	Gm13	40139731	40145370	UniRef100_K7M2U1 Uncharacterized protein n=1 Tax=Glycine max RepID=K7M2U1_SOYBN	UniRef100_G7IRJ6 Myrcene synthase n=1 Tax=Medicago truncatula RepID=G7IRJ6_MEDTR	AT4G16730.1|Symbols:TPS02|terpene synthase 02|chr4:9403119-9406003 FORWARD LENGTH=539	metabolic process	lyase activity; magnesium ion binding; terpene synthase activity	Terpene synthase, N-terminal domain; Terpene synthase family, metal binding domain
Glyma.13G304600	Gm13	40155003	40157401	UniRef100_V7BYU8 Uncharacterized protein n=1 Tax=Phaseolus vulgaris RepID=V7BYU8_PHAVU	UniRef100_Q6EJ97 Isoprene synthase, chloroplastic n=1 Tax=Pueraria montana var. lobata RepID=ISPS_PUEML	AT4G16730.1|Symbols:TPS02|terpene synthase 02|chr4:9403119-9406003 FORWARD LENGTH=539	metabolic process	lyase activity; magnesium ion binding; terpene synthase activity	Terpene synthase, N-terminal domain; Terpene synthase family, metal binding domain
Glyma.13G304700	Gm13	40159804	40161491	UniRef100_V7BZZ3 Uncharacterized protein (Fragment) n=1 Tax=Phaseolus vulgaris RepID=V7BZZ3_PHAVU	UniRef100_Q6EJ97 Isoprene synthase, chloroplastic n=1 Tax=Pueraria montana var. lobata RepID=ISPS_PUEML	AT4G16730.1|Symbols:TPS02|terpene synthase 02|chr4:9403119-9406003 FORWARD LENGTH=539	metabolic process	lyase activity; magnesium ion binding; terpene synthase activity	Terpene synthase, N-terminal domain; Terpene synthase family, metal binding domain
Glyma.13G304800	Gm13	40161768	40162729	UniRef100_K7M2U3 Uncharacterized protein n=1 Tax=Glycine max RepID=K7M2U3_SOYBN	UniRef100_Q6EJ97 Isoprene synthase, chloroplastic n=1 Tax=Pueraria montana var. lobata RepID=ISPS_PUEML	AT3G25810.1|Symbols:|Terpenoid cyclases/Protein prenyltransferases superfamily protein|chr3:9430805-9433844 FORWARD LENGTH=598	metabolic process; monoterpene biosynthetic process	(4S)-limonene synthase activity; (E)-beta-ocimene synthase activity; (R)-limonene synthase activity; lyase activity; magnesium ion binding; myrcene synthase activity; pinene synthase activity; protein binding; sabinene synthase activity; sesquiterpene synthase activity; terpene synthase activity	Terpene synthase family, metal binding domain
Glyma.13G304900	Gm13	40165918	40167922	UniRef100_K7M2U4 Uncharacterized protein n=1 Tax=Glycine max RepID=K7M2U4_SOYBN	UniRef100_G7IRJ4 GRAS family transcription factor n=1 Tax=Medicago truncatula RepID=G7IRJ4_MEDTR	AT3G49950.1|Symbols:|GRAS family transcription factor|chr3:18522570-18523802 FORWARD LENGTH=410	regulation of transcription, DNA-dependent	sequence-specific DNA binding transcription factor activity	GRAS domain family
Glyma.13G305000	Gm13	40175785	40190048	UniRef100_I1M406 Uncharacterized protein n=1 Tax=Glycine max RepID=I1M406_SOYBN	UniRef100_G7IRJ2 Histone-lysine N-methyltransferase E(Z) n=1 Tax=Medicago truncatula RepID=G7IRJ2_MEDTR	AT4G15180.1|Symbols:SDG2, ATXR3|SET domain protein 2|chr4:8651999-8662178 FORWARD LENGTH=2335	carpel development; post-embryonic development; stamen development; vegetative to reproductive phase transition of meristem	histone methyltransferase activity (H3-K4 specific)	SET domain
Glyma.13G305100	Gm13	40198030	40199244	UniRef100_I1M407 Uncharacterized protein n=1 Tax=Glycine max RepID=I1M407_SOYBN	NA	AT2G32280.1|Symbols:|Protein of unknown function (DUF1218)|chr2:13713210-13713977 FORWARD LENGTH=163	biological process	molecular function	Protein of unknown function (DUF1218)
Glyma.13G305200	Gm13	40202545	40205956	UniRef100_I1M408 Beta-amylase n=1 Tax=Glycine max RepID=I1M408_SOYBN	UniRef100_I1M408 Beta-amylase n=1 Tax=Glycine max RepID=I1M408_SOYBN	AT2G32290.1|Symbols:BMY5, BAM6|beta-amylase 6|chr2:13714643-13716906 REVERSE LENGTH=577	carbohydrate metabolic process; cellulose biosynthetic process; polysaccharide catabolic process	beta-amylase activity; catalytic activity; cation binding	Glycosyl hydrolase family 14
Glyma.13G305300	Gm13	40207450	40211180	UniRef100_I1M409 Beta-amylase (Fragment) n=1 Tax=Glycine max RepID=I1M409_SOYBN	UniRef100_I1M409 Beta-amylase (Fragment) n=1 Tax=Glycine max RepID=I1M409_SOYBN	AT2G32290.1|Symbols:BMY5, BAM6|beta-amylase 6|chr2:13714643-13716906 REVERSE LENGTH=577	carbohydrate metabolic process; cellulose biosynthetic process; polysaccharide catabolic process	beta-amylase activity; catalytic activity; cation binding	Glycosyl hydrolase family 14
Glyma.13G305400	Gm13	40212855	40214010	UniRef100_I1M410 Uncharacterized protein n=1 Tax=Glycine max RepID=I1M410_SOYBN	UniRef100_G7IKM4 Defensin fusion n=1 Tax=Medicago truncatula RepID=G7IKM4_MEDTR	AT3G22070.1|Symbols:|proline-rich family protein|chr3:7775530-7776066 REVERSE LENGTH=178	biological process	molecular function	NA
Glyma.13G305500	Gm13	40218499	40220682	UniRef100_I1M411 Uncharacterized protein n=1 Tax=Glycine max RepID=I1M411_SOYBN	UniRef100_G7IKM3 Transcription factor ILR3 n=1 Tax=Medicago truncatula RepID=G7IKM3_MEDTR	AT1G51070.1|Symbols:bHLH115|basic helix-loop-helix (bHLH) DNA-binding superfamily protein|chr1:18928018-18929513 FORWARD LENGTH=226	cysteine biosynthetic process; regulation of transcription, DNA-dependent	DNA binding; sequence-specific DNA binding transcription factor activity	Helix-loop-helix DNA-binding domain
Glyma.13G305600	Gm13	40221285	40222935	UniRef100_I1M412 Uncharacterized protein n=1 Tax=Glycine max RepID=I1M412_SOYBN	UniRef100_G7IKM2 Blue copper protein n=1 Tax=Medicago truncatula RepID=G7IKM2_MEDTR	AT2G32300.1|Symbols:UCC1|uclacyanin 1|chr2:13722510-13723464 FORWARD LENGTH=261	root hair cell differentiation; root hair elongation	copper ion binding; electron carrier activity	Plastocyanin-like domain
Glyma.13G305700	Gm13	40223877	40224773	UniRef100_UPI0003DE7B8B PREDICTED: cysteine-rich repeat secretory protein 38-like n=1 Tax=Glycine max RepID=UPI0003DE7B8B	UniRef100_B9HE43 Receptor-like protein kinase n=1 Tax=Populus trichocarpa RepID=B9HE43_POPTR	AT3G22060.1|Symbols:|Receptor-like protein kinase-related family protein|chr3:7771065-7772137 FORWARD LENGTH=252	response to abscisic acid stimulus; response to molecule of bacterial origin	molecular function	Salt stress response/antifungal
Glyma.13G305800	Gm13	40228826	40229784	UniRef100_UPI000189D8B6 PREDICTED: cysteine-rich repeat secretory protein 38 n=1 Tax=Glycine max RepID=UPI000189D8B6	UniRef100_G7IKM1 Cysteine-rich repeat secretory protein n=1 Tax=Medicago truncatula RepID=G7IKM1_MEDTR	AT3G22060.1|Symbols:|Receptor-like protein kinase-related family protein|chr3:7771065-7772137 FORWARD LENGTH=252	response to abscisic acid stimulus; response to molecule of bacterial origin	molecular function	Salt stress response/antifungal
Glyma.13G305900	Gm13	40232702	40233439	UniRef100_K7M2U5 Uncharacterized protein n=1 Tax=Glycine max RepID=K7M2U5_SOYBN	UniRef100_G7IKL6 Cysteine-rich repeat secretory protein n=1 Tax=Medicago truncatula RepID=G7IKL6_MEDTR	AT3G22060.1|Symbols:|Receptor-like protein kinase-related family protein|chr3:7771065-7772137 FORWARD LENGTH=252	response to abscisic acid stimulus; response to molecule of bacterial origin	molecular function	Salt stress response/antifungal
Glyma.13G306000	Gm13	40235520	40237995	UniRef100_I1M415 Uncharacterized protein n=1 Tax=Glycine max RepID=I1M415_SOYBN	NA	AT1G05280.1|Symbols:|Protein of unknown function (DUF604)|chr1:1535444-1537414 REVERSE LENGTH=461	biological process	transferase activity, transferring glycosyl groups	Protein of unknown function, DUF604
Glyma.13G306100	Gm13	40241555	40243845	UniRef100_K7M2U6 Uncharacterized protein n=1 Tax=Glycine max RepID=K7M2U6_SOYBN	NA	AT1G05280.1|Symbols:|Protein of unknown function (DUF604)|chr1:1535444-1537414 REVERSE LENGTH=461	biological process	transferase activity, transferring glycosyl groups	Protein of unknown function, DUF604
Glyma.13G306200	Gm13	40245855	40248410	UniRef100_K7M2U7 Uncharacterized protein n=1 Tax=Glycine max RepID=K7M2U7_SOYBN	NA	AT1G05280.1|Symbols:|Protein of unknown function (DUF604)|chr1:1535444-1537414 REVERSE LENGTH=461	biological process	transferase activity, transferring glycosyl groups	Protein of unknown function, DUF604
Glyma.13G306300	Gm13	40254957	40256290	UniRef100_I1M418 Uncharacterized protein n=1 Tax=Glycine max RepID=I1M418_SOYBN	UniRef100_B9HE36 Zinc finger family protein n=1 Tax=Populus trichocarpa RepID=B9HE36_POPTR	AT4G15248.1|Symbols:|B-box type zinc finger family protein|chr4:8708881-8709234 FORWARD LENGTH=117	biological process	zinc ion binding	NA
Glyma.13G306400	Gm13	40256984	40261589	UniRef100_K7M2U8 Uncharacterized protein n=1 Tax=Glycine max RepID=K7M2U8_SOYBN	UniRef100_D0EP07 CONSTANS-like zinc finger protein n=1 Tax=Glycine max RepID=D0EP07_SOYBN	AT3G21880.1|Symbols:|B-box type zinc finger protein with CCT domain|chr3:7706748-7708093 FORWARD LENGTH=364	regulation of transcription, DNA-dependent	sequence-specific DNA binding transcription factor activity; zinc ion binding	CCT motif
Glyma.13G306500	Gm13	40267851	40277763	UniRef100_I1M420 Uncharacterized protein n=2 Tax=Glycine max RepID=I1M420_SOYBN	UniRef100_G7IKL2 Xenotropic and polytropic retrovirus receptor n=1 Tax=Medicago truncatula RepID=G7IKL2_MEDTR	AT5G35730.1|Symbols:|EXS (ERD1/XPR1/SYG1) family protein|chr5:13893941-13896821 FORWARD LENGTH=457	biological process	molecular function	EXS family
Glyma.13G306600	Gm13	40276124	40277786	UniRef100_C6T3E7 Putative uncharacterized protein n=1 Tax=Glycine max RepID=C6T3E7_SOYBN	UniRef100_G7IKL1 Cyclin-U1-1 n=1 Tax=Medicago truncatula RepID=G7IKL1_MEDTR	AT3G21870.1|Symbols:CYCP2;1|cyclin p2;1|chr3:7703927-7704813 REVERSE LENGTH=210	regulation of cell cycle; regulation of cyclin-dependent protein serine/threonine kinase activity; stomatal lineage progression	cyclin-dependent protein serine/threonine kinase activity; protein binding; protein kinase binding	Cyclin
Glyma.13G306700	Gm13	40278794	40283229	UniRef100_I1M423 Uncharacterized protein n=1 Tax=Glycine max RepID=I1M423_SOYBN	UniRef100_Q9LSX7 Peroxisome biogenesis protein 22 n=1 Tax=Arabidopsis thaliana RepID=PEX22_ARATH	AT3G21865.1|Symbols:PEX22|peroxin 22|chr3:7701308-7703218 REVERSE LENGTH=283	peroxisome organization	protein binding	NA
Glyma.13G306800	Gm13	40284378	40289398	UniRef100_K7M2V4 Uncharacterized protein n=1 Tax=Glycine max RepID=K7M2V4_SOYBN	UniRef100_G7IKK8 Histone-lysine N-methyltransferase ATXR2 n=1 Tax=Medicago truncatula RepID=G7IKK8_MEDTR	AT3G21820.1|Symbols:ATXR2, SDG36|histone-lysine N-methyltransferase ATXR2|chr3:7688629-7691444 REVERSE LENGTH=473	biological process	zinc ion binding	MYND finger
Glyma.13G306900	Gm13	40290724	40292997	UniRef100_UPI000189D1F4 PREDICTED: peroxidase 39-like n=1 Tax=Glycine max RepID=UPI000189D1F4	UniRef100_Q9ZNZ5 Peroxidase (Fragment) n=2 Tax=Glycine max RepID=Q9ZNZ5_SOYBN	AT4G11290.1|Symbols:|Peroxidase superfamily protein|chr4:6869993-6871476 FORWARD LENGTH=326	oxidation-reduction process; response to oxidative stress	heme binding; peroxidase activity	Peroxidase
Glyma.13G307000	Gm13	40297529	40299479	UniRef100_Q9ZNZ5 Peroxidase (Fragment) n=2 Tax=Glycine max RepID=Q9ZNZ5_SOYBN	UniRef100_Q9ZNZ5 Peroxidase (Fragment) n=2 Tax=Glycine max RepID=Q9ZNZ5_SOYBN	AT1G05260.1|Symbols:RCI3, RCI3A|Peroxidase superfamily protein|chr1:1529827-1531271 FORWARD LENGTH=326	brassinosteroid biosynthetic process; cellular response to iron ion starvation; hyperosmotic salinity response; iron ion transport; nitrate transport; oxidation-reduction process; response to cold; response to desiccation; response to nitrate; response to oxidative stress; trichoblast differentiation	heme binding; peroxidase activity	Peroxidase
Glyma.13G307100	Gm13	40308260	40309381	UniRef100_I1M427 Uncharacterized protein n=1 Tax=Glycine max RepID=I1M427_SOYBN	UniRef100_B9MXY0 Ubiquitin family protein n=1 Tax=Populus trichocarpa RepID=B9MXY0_POPTR	AT2G32350.1|Symbols:|Ubiquitin-like superfamily protein|chr2:13734979-13735788 FORWARD LENGTH=242	NA	molecular function	Ubiquitin family
Glyma.13G307200	Gm13	40310840	40313741	UniRef100_K7M2V5 Uncharacterized protein n=1 Tax=Glycine max RepID=K7M2V5_SOYBN	UniRef100_G7IKK2 APO protein n=1 Tax=Medicago truncatula RepID=G7IKK2_MEDTR	AT3G21740.1|Symbols:APO4|Arabidopsis thaliana protein of unknown function (DUF794)|chr3:7662542-7663638 REVERSE LENGTH=337	biological process	NA	APO RNA-binding
Glyma.13G307300	Gm13	40316212	40317730	UniRef100_UPI00005B0D33 PREDICTED: MYB transcription factor MYB172 isoform X1 n=1 Tax=Glycine max RepID=UPI00005B0D33	UniRef100_Q0PJF6 MYB transcription factor MYB172 n=1 Tax=Glycine max RepID=Q0PJF6_SOYBN	AT1G01380.1|Symbols:ETC1|Homeodomain-like superfamily protein|chr1:147267-147740 FORWARD LENGTH=83	cell fate specification; epidermal cell differentiation; regulation of transcription, DNA-dependent	DNA binding; sequence-specific DNA binding transcription factor activity	Myb-like DNA-binding domain
Glyma.13G307400	Gm13	40318254	40319183	UniRef100_K7M2V7 Uncharacterized protein n=1 Tax=Glycine max RepID=K7M2V7_SOYBN	NA	NA	NA	NA	NA
Glyma.13G307500	Gm13	40319744	40319911	UniRef100_K7M2V8 Uncharacterized protein n=1 Tax=Glycine max RepID=K7M2V8_SOYBN	NA	NA	NA	NA	NA
Glyma.13G307600	Gm13	40323937	40327786	UniRef100_C6THU9 Uncharacterized protein n=1 Tax=Glycine max RepID=C6THU9_SOYBN	UniRef100_G7IKJ7 Syntaxin-132 n=1 Tax=Medicago truncatula RepID=G7IKJ7_MEDTR	AT3G03800.1|Symbols:SYP131, ATSYP131|syntaxin of plants 131|chr3:969314-971460 FORWARD LENGTH=306	cellular membrane fusion; intracellular protein transport; vesicle-mediated transport	SNAP receptor activity	Syntaxin; SNARE domain
Glyma.13G307700	Gm13	40333363	40333923	UniRef100_K7M2V9 Uncharacterized protein n=1 Tax=Glycine max RepID=K7M2V9_SOYBN	UniRef100_Q1STP6 Harpin-induced 1 n=2 Tax=Medicago truncatula RepID=Q1STP6_MEDTR	AT2G46150.1|Symbols:|Late embryogenesis abundant (LEA) hydroxyproline-rich glycoprotein family|chr2:18961424-18962089 FORWARD LENGTH=221	biological process	molecular function	Late embryogenesis abundant protein
Glyma.13G307800	Gm13	40336339	40336899	UniRef100_I1M432 Uncharacterized protein n=2 Tax=Glycine max RepID=I1M432_SOYBN	UniRef100_Q19QU4 Plant cell wall protein SlTFR88 n=1 Tax=Solanum lycopersicum RepID=Q19QU4_SOLLC	AT2G46150.1|Symbols:|Late embryogenesis abundant (LEA) hydroxyproline-rich glycoprotein family|chr2:18961424-18962089 FORWARD LENGTH=221	biological process	molecular function	NA
Glyma.13G307900	Gm13	40339771	40340331	UniRef100_I1M433 Uncharacterized protein n=1 Tax=Glycine max RepID=I1M433_SOYBN	UniRef100_Q1STP6 Harpin-induced 1 n=2 Tax=Medicago truncatula RepID=Q1STP6_MEDTR	AT2G46150.1|Symbols:|Late embryogenesis abundant (LEA) hydroxyproline-rich glycoprotein family|chr2:18961424-18962089 FORWARD LENGTH=221	biological process	molecular function	Late embryogenesis abundant protein
Glyma.13G308000	Gm13	40348228	40349879	UniRef100_C6SYG9 Uncharacterized protein n=2 Tax=Glycine max RepID=C6SYG9_SOYBN	UniRef100_Q9LSZ3 Genomic DNA, chromosome 3, P1 clone: MSD21 n=1 Tax=Arabidopsis thaliana RepID=Q9LSZ3_ARATH	AT3G21710.2|Symbols:|unknown protein; Has 35333 Blast hits to 34131 proteins in 2444 species: Archae - 798; Bacteria - 22429; Metazoa - 974; Fungi - 991; Plants - 531; Viruses - 0; Other Eukaryotes - 9610 (source: NCBI BLink).|chr3:7648380-7649533 FORWARD LENGTH=211	biological process; cellular response to iron ion starvation; glucuronoxylan metabolic process; iron ion transport; nitrate transport; response to nitrate; transition metal ion transport; xylan biosynthetic process	molecular function	NA
Glyma.13G308100	Gm13	40351682	40354044	UniRef100_C6T2R2 Uncharacterized protein n=1 Tax=Glycine max RepID=C6T2R2_SOYBN	UniRef100_T2DNF2 RING-box protein 1 n=1 Tax=Phaseolus vulgaris RepID=T2DNF2_PHAVU	AT5G20570.1|Symbols:ROC1, RBX1, HRT1, ATRBX1|RING-box 1|chr5:6956905-6958221 REVERSE LENGTH=118	DNA endoreduplication; photorespiration; proteasomal ubiquitin-dependent protein catabolic process; proteasome assembly; proteasome core complex assembly; protein sumoylation; protein ubiquitination; regulation of circadian rhythm; regulation of unidimensional cell growth; response to auxin stimulus; response to misfolded protein; ubiquitin-dependent protein catabolic process	protein binding; zinc ion binding	NA
Glyma.13G308200	Gm13	40389177	40396354	UniRef100_I1M436 Uncharacterized protein n=1 Tax=Glycine max RepID=I1M436_SOYBN	UniRef100_G7IKI0 Homeobox-leucine zipper protein ROC7 n=1 Tax=Medicago truncatula RepID=G7IKI0_MEDTR	AT1G05230.4|Symbols:HDG2|homeodomain GLABROUS 2|chr1:1513388-1517024 REVERSE LENGTH=721	maintenance of floral organ identity; regulation of transcription, DNA-dependent; stomatal complex morphogenesis; trichome morphogenesis	DNA binding; sequence-specific DNA binding; sequence-specific DNA binding transcription factor activity	Homeobox domain; START domain
Glyma.13G308300	Gm13	40397686	40399507	UniRef100_I1LU59 Uncharacterized protein n=1 Tax=Glycine max RepID=I1LU59_SOYBN	UniRef100_Q00UQ3 WGS project CAID00000000 data, contig chromosome 15 n=1 Tax=Ostreococcus tauri RepID=Q00UQ3_OSTTA	AT1G05205.1|Symbols:|unknown protein; Has 44 Blast hits to 44 proteins in 16 species: Archae - 0; Bacteria - 0; Metazoa - 0; Fungi - 0; Plants - 44; Viruses - 0; Other Eukaryotes - 0 (source: NCBI BLink).|chr1:1509352-1510249 REVERSE LENGTH=91	biological process; photorespiration	molecular function	NA
Glyma.13G308400	Gm13	40402270	40408331	UniRef100_K7M2W3 Glutamate receptor n=1 Tax=Glycine max RepID=K7M2W3_SOYBN	UniRef100_K7M2W3 Glutamate receptor n=1 Tax=Glycine max RepID=K7M2W3_SOYBN	AT1G05200.2|Symbols:ATGLR3.4, GLR3.4, GLUR3|glutamate receptor 3.4|chr1:1505642-1509002 FORWARD LENGTH=959	calcium-mediated signaling; calcium ion transport; cellular calcium ion homeostasis; cellular cation homeostasis; cellular response to acetate; cellular response to amino acid stimulus; cellular response to cold; cellular response to mechanical stimulus; response to light stimulus; response to wounding	calcium channel activity; glutamate receptor activity; intracellular ligand-gated ion channel activity; ligand-gated ion channel activity; protein binding	Receptor family ligand binding region; Ligand-gated ion channel; Bacterial extracellular solute-binding proteins, family 3
Glyma.13G308500	Gm13	40413291	40419050	UniRef100_I1M440 Glutamate receptor n=1 Tax=Glycine max RepID=I1M440_SOYBN	UniRef100_I1M440 Glutamate receptor n=1 Tax=Glycine max RepID=I1M440_SOYBN	AT2G32400.1|Symbols:GLR5, GLR3.7, ATGLR3.7|glutamate receptor 5|chr2:13752665-13756233 REVERSE LENGTH=921	G-protein coupled receptor signaling pathway; cellular calcium ion homeostasis; response to light stimulus; transport	G-protein coupled GABA receptor activity; extracellular-glutamate-gated ion channel activity; intracellular ligand-gated ion channel activity; ionotropic glutamate receptor activity; protein binding; transporter activity	Ligand-gated ion channel; Bacterial extracellular solute-binding proteins, family 3; Receptor family ligand binding region
Glyma.13G308600	Gm13	40425076	40426625	UniRef100_I1M441 Uncharacterized protein n=1 Tax=Glycine max RepID=I1M441_SOYBN	NA	NA	NA	NA	NA
Glyma.13G308700	Gm13	40427362	40435226	UniRef100_I1M442 Uncharacterized protein n=1 Tax=Glycine max RepID=I1M442_SOYBN	UniRef100_G7ITZ5 Aconitate hydratase n=1 Tax=Medicago truncatula RepID=G7ITZ5_MEDTR	AT2G05710.1|Symbols:ACO3|aconitase 3|chr2:2141591-2146350 FORWARD LENGTH=990	Golgi organization; citrate metabolic process; ethylene mediated signaling pathway; gluconeogenesis; glycolysis; hyperosmotic response; iron ion homeostasis; isocitrate metabolic process; metabolic process; photorespiration; photosynthesis; proteasome core complex assembly; protein N-linked glycosylation; protein glycosylation; response to abscisic acid stimulus; response to auxin stimulus; respo…	4 iron, 4 sulfur cluster binding; ATP binding; aconitate hydratase activity; copper ion binding	Aconitase family (aconitate hydratase); Aconitase C-terminal domain
Glyma.13G308800	Gm13	40439400	40440261	UniRef100_I1M444 Uncharacterized protein n=1 Tax=Glycine max RepID=I1M444_SOYBN	UniRef100_G7ITZ1 Rhomboid family member n=1 Tax=Medicago truncatula RepID=G7ITZ1_MEDTR	AT5G54970.1|Symbols:|unknown protein; BEST Arabidopsis thaliana protein match is: unknown protein (TAIR:AT4G26960.1); Has 1807 Blast hits to 1807 proteins in 277 species: Archae - 0; Bacteria - 0; Metazoa - 736; Fungi - 347; Plants - 385; Viruses - 0; Other Eukaryotes - 339 (source: NCBI BLink).|chr5:22313271-22313648 FORWARD LENGTH=125	biological process	molecular function	NA
Glyma.13G308900	Gm13	40457111	40461967	UniRef100_I1M445 Uncharacterized protein n=1 Tax=Glycine max RepID=I1M445_SOYBN	UniRef100_B9IAF8 Galactosyltransferase family protein n=1 Tax=Populus trichocarpa RepID=B9IAF8_POPTR	AT1G05170.2|Symbols:|Galactosyltransferase family protein|chr1:1491460-1493931 REVERSE LENGTH=407	protein glycosylation	galactosyltransferase activity; transferase activity, transferring glycosyl groups; transferase activity, transferring hexosyl groups	Galactosyltransferase
Glyma.13G309000	Gm13	40467643	40467801	UniRef100_G7ITY4 Putative uncharacterized protein n=1 Tax=Medicago truncatula RepID=G7ITY4_MEDTR	UniRef100_Q6X5V0 DVL1 n=1 Tax=Arabidopsis thaliana RepID=Q6X5V0_ARATH	AT5G16023.1|Symbols:RTFL18, DVL1|ROTUNDIFOLIA like 18|chr5:5232731-5232886 REVERSE LENGTH=51	shoot system development; socket cell differentiation	molecular function	DVL family
Glyma.13G309100	Gm13	40474211	40476757	UniRef100_K7M2W5 Uncharacterized protein n=1 Tax=Glycine max RepID=K7M2W5_SOYBN	UniRef100_G3C9V3 Phenylpropenal double-bond reductase n=1 Tax=Pinus pinaster RepID=G3C9V3_PINPS	AT5G16970.1|Symbols:AT-AER, AER|alkenal reductase|chr5:5576291-5578001 REVERSE LENGTH=345	amino acid transport; proline transport; response to cadmium ion; response to cyclopentenone; response to oxidative stress; toxin catabolic process	2-alkenal reductase [NAD(P)] activity; nucleotide binding; oxidoreductase activity; transferase activity, transferring acyl groups other than amino-acyl groups; zinc ion binding	Zinc-binding dehydrogenase
Glyma.13G309200	Gm13	40482889	40486840	UniRef100_K7M2W6 Uncharacterized protein n=1 Tax=Glycine max RepID=K7M2W6_SOYBN	UniRef100_Q02994 Protein 3 n=1 Tax=Petunia hybrida RepID=Q02994_PETHY	AT2G32460.1|Symbols:MYB101, ATMYB101, ATM1|myb domain protein 101|chr2:13782419-13784363 REVERSE LENGTH=490	gibberellic acid mediated signaling pathway; gibberellin biosynthetic process; pollen development; positive regulation of abscisic acid mediated signaling pathway; positive regulation of programmed cell death; positive regulation of transcription, DNA-dependent; regulation of transcription, DNA-dependent	DNA binding; sequence-specific DNA binding transcription factor activity	Myb-like DNA-binding domain
Glyma.13G309300	Gm13	40509929	40514843	UniRef100_K7M2W8 Uncharacterized protein n=1 Tax=Glycine max RepID=K7M2W8_SOYBN	UniRef100_A2Q4I2 Arogenate dehydratase/prephenate dehydratase n=2 Tax=Medicago truncatula RepID=A2Q4I2_MEDTR	AT1G11790.1|Symbols:ADT1|arogenate dehydratase 1|chr1:3981476-3984962 FORWARD LENGTH=392	L-phenylalanine biosynthetic process; anthocyanin accumulation in tissues in response to UV light; carpel development; metabolic process; vernalization response	amino acid binding; arogenate dehydratase activity; prephenate dehydratase activity	Prephenate dehydratase
Glyma.13G309400	Gm13	40514471	40514665	UniRef100_K7M2W9 Uncharacterized protein n=1 Tax=Glycine max RepID=K7M2W9_SOYBN	NA	NA	NA	NA	NA
Glyma.13G309500	Gm13	40521653	40522211	NA	NA	NA	NA	NA	NA
Glyma.13G309600	Gm13	40521916	40525060	UniRef100_I1M450 Uncharacterized protein n=1 Tax=Glycine max RepID=I1M450_SOYBN	NA	NA	NA	NA	NA
Glyma.13G309700	Gm13	40532836	40540406	UniRef100_K7M2X2 Uncharacterized protein n=1 Tax=Glycine max RepID=K7M2X2_SOYBN	UniRef100_G7JEP7 DNA repair protein RAD5 n=1 Tax=Medicago truncatula RepID=G7JEP7_MEDTR	AT1G05120.1|Symbols:|Helicase protein with RING/U-box domain|chr1:1471624-1476067 REVERSE LENGTH=833	NA	ATP binding; DNA binding; helicase activity; nucleic acid binding; zinc ion binding	Helicase conserved C-terminal domain; Zinc finger, C3HC4 type (RING finger); SNF2 family N-terminal domain
Glyma.13G309800	Gm13	40541091	40543554	UniRef100_I1M452 Uncharacterized protein n=1 Tax=Glycine max RepID=I1M452_SOYBN	UniRef100_A2Q4H3 Prefoldin n=1 Tax=Medicago truncatula RepID=A2Q4H3_MEDTR	AT5G42570.1|Symbols:|B-cell receptor-associated 31-like|chr5:17021459-17022497 REVERSE LENGTH=218	intracellular protein transport	molecular function	B-cell receptor-associated protein 31-like
Glyma.13G309900	Gm13	40545396	40546592	UniRef100_K7M2X3 Uncharacterized protein n=1 Tax=Glycine max RepID=K7M2X3_SOYBN	UniRef100_A2Q4H0 Mitogen-activated protein kinase kinase kinase A n=1 Tax=Medicago truncatula RepID=A2Q4H0_MEDTR	AT2G32510.1|Symbols:MAPKKK17|mitogen-activated protein kinase kinase kinase 17|chr2:13798821-13799939 REVERSE LENGTH=372	protein phosphorylation	ATP binding; kinase activity; protein kinase activity; protein serine/threonine kinase activity; transferase activity, transferring phosphorus-containing groups	Protein kinase domain
Glyma.13G310000	Gm13	40553328	40556401	UniRef100_K7M2X4 Uncharacterized protein (Fragment) n=1 Tax=Glycine max RepID=K7M2X4_SOYBN	UniRef100_C6JT08 Aspartic proteinase (Fragment) n=1 Tax=Sonneratia alba RepID=C6JT08_9MYRT	NA	NA	NA	Eukaryotic aspartyl protease; Saposin-like type B, region 1
Glyma.13G310100	Gm13	40564513	40567479	UniRef100_I1M456 Uncharacterized protein n=2 Tax=Glycine max RepID=I1M456_SOYBN	UniRef100_G7ITV7 WRKY transcription factor n=2 Tax=Medicago truncatula RepID=G7ITV7_MEDTR	AT1G62300.1|Symbols:WRKY6, ATWRKY6|WRKY family transcription factor|chr1:23016887-23019155 REVERSE LENGTH=553	amino acid import; cellular response to boron-containing substance deprivation; cellular response to phosphate starvation; intracellular signal transduction; negative regulation of transcription, DNA-dependent; regulation of transcription, DNA-dependent; respiratory burst involved in defense response; response to chitin; response to cyclopentenone; toxin catabolic process	protein binding; sequence-specific DNA binding; sequence-specific DNA binding transcription factor activity; transcription regulatory region DNA binding	WRKY DNA -binding domain
Glyma.13G310200	Gm13	40576582	40581419	UniRef100_K7M2X6 Uncharacterized protein (Fragment) n=1 Tax=Glycine max RepID=K7M2X6_SOYBN	UniRef100_V5N947 Dienelactone hydrolase family protein n=1 Tax=Phaseolus vulgaris RepID=V5N947_PHAVU	AT2G32520.1|Symbols:|alpha/beta-Hydrolases superfamily protein|chr2:13805823-13807442 REVERSE LENGTH=239	metabolic process; response to zinc ion	hydrolase activity; transferase activity, transferring acyl groups other than amino-acyl groups	Dienelactone hydrolase family
Glyma.13G310300	Gm13	40581901	40586398	UniRef100_I1M458 Uncharacterized protein n=1 Tax=Glycine max RepID=I1M458_SOYBN	UniRef100_G7ITV3 Cellulose synthase-like protein H1 n=1 Tax=Medicago truncatula RepID=G7ITV3_MEDTR	AT2G32530.1|Symbols:ATCSLB03, CSLB03, ATCSLB3|cellulose synthase-like B3|chr2:13809283-13813487 FORWARD LENGTH=755	cellulose biosynthetic process; polysaccharide biosynthetic process	cellulose synthase (UDP-forming) activity; cellulose synthase activity; transferase activity; transferase activity, transferring glycosyl groups	Cellulose synthase
Glyma.13G310400	Gm13	40590488	40592741	UniRef100_I1M459 Uncharacterized protein n=1 Tax=Glycine max RepID=I1M459_SOYBN	UniRef100_Q9ZVP1 T7A14.6 protein n=1 Tax=Arabidopsis thaliana RepID=Q9ZVP1_ARATH	AT1G05070.1|Symbols:|Protein of unknown function (DUF1068)|chr1:1457172-1458531 REVERSE LENGTH=184	biological process; vegetative phase change; virus induced gene silencing	molecular function	Protein of unknown function (DUF1068)
Glyma.13G310500	Gm13	40599533	40602585	UniRef100_C6SZ64 Uncharacterized protein n=1 Tax=Glycine max RepID=C6SZ64_SOYBN	UniRef100_Q9LVE5 Genomic DNA, chromosome 3, P1 clone: MIL23 n=1 Tax=Arabidopsis thaliana RepID=Q9LVE5_ARATH	AT3G21610.1|Symbols:|Acid phosphatase/vanadium-dependent haloperoxidase-related protein|chr3:7609377-7610601 REVERSE LENGTH=174	biological process	molecular function	Divergent PAP2 family
Glyma.13G310600	Gm13	40603354	40608218	UniRef100_I1LU28 Uncharacterized protein n=1 Tax=Glycine max RepID=I1LU28_SOYBN	UniRef100_T2DPI2 rRNA-processing protein FCF1-like protein n=1 Tax=Phaseolus vulgaris RepID=T2DPI2_PHAVU	AT2G46230.1|Symbols:|PIN domain-like family protein|chr2:18984459-18985850 REVERSE LENGTH=196	biological process; protein maturation	molecular function	Fcf1
Glyma.13G310700	Gm13	40612683	40623281	UniRef100_I1M465 Uncharacterized protein n=1 Tax=Glycine max RepID=I1M465_SOYBN	UniRef100_G7IRI6 Kinesin-like protein n=1 Tax=Medicago truncatula RepID=G7IRI6_MEDTR	AT3G44050.1|Symbols:|P-loop containing nucleoside triphosphate hydrolases superfamily protein|chr3:15818738-15824792 FORWARD LENGTH=1263	chromatin silencing by small RNA; cytokinesis by cell plate formation; epidermal cell fate specification; gene silencing; histone H3-K9 methylation; histone lysine methylation; histone phosphorylation; methylation-dependent chromatin silencing; microtubule cytoskeleton organization; mitotic cell cycle; regulation of flower development; spindle assembly	ATP binding; microtubule motor activity	Kinesin motor domain
Glyma.13G310800	Gm13	40624875	40626096	UniRef100_I1M466 Uncharacterized protein n=1 Tax=Glycine max RepID=I1M466_SOYBN	UniRef100_Q43713 Pollen preferential protein n=1 Tax=Lilium longiflorum RepID=Q43713_LILLO	AT2G27180.1|Symbols:|unknown protein; BEST Arabidopsis thaliana protein match is: unknown protein (TAIR:AT3G11690.1); Has 99 Blast hits to 99 proteins in 14 species: Archae - 0; Bacteria - 0; Metazoa - 0; Fungi - 0; Plants - 99; Viruses - 0; Other Eukaryotes - 0 (source: NCBI BLink).|chr2:11620473-11620970 FORWARD LENGTH=165	biological process	molecular function	NA
Glyma.13G310900	Gm13	40628150	40633326	UniRef100_I1M467 Uncharacterized protein n=1 Tax=Glycine max RepID=I1M467_SOYBN	UniRef100_G7IRI2 RING finger protein n=1 Tax=Medicago truncatula RepID=G7IRI2_MEDTR	AT5G22000.3|Symbols:RHF2A|RING-H2 group F2A|chr5:7277436-7279553 FORWARD LENGTH=375	autophagy; cellular macromolecule catabolic process; fatty acid beta-oxidation; hormone-mediated signaling pathway; megagametogenesis; microgametogenesis; protein import into peroxisome matrix; proteolysis involved in cellular protein catabolic process; regulation of cell cycle; salicylic acid biosynthetic process; signal transduction; systemic acquired resistance	zinc ion binding	Zinc finger, C3HC4 type (RING finger)
Glyma.13G311000	Gm13	40640137	40643596	UniRef100_I1M469 Uncharacterized protein n=1 Tax=Glycine max RepID=I1M469_SOYBN	UniRef100_Q06I80 Fasciclin-like protein FLA26 n=1 Tax=Triticum aestivum RepID=Q06I80_WHEAT	AT5G06390.1|Symbols:FLA17|FASCICLIN-like arabinogalactan protein 17 precursor|chr5:1952939-1955047 FORWARD LENGTH=458	cell adhesion	molecular function	Fasciclin domain
Glyma.13G311100	Gm13	40644662	40647897	UniRef100_K7M2Y1 Uncharacterized protein n=1 Tax=Glycine max RepID=K7M2Y1_SOYBN	UniRef100_G7IRH8 Adipocyte plasma membrane-associated protein n=1 Tax=Medicago truncatula RepID=G7IRH8_MEDTR	AT1G08470.1|Symbols:SSL3|strictosidine synthase-like 3|chr1:2682262-2683977 REVERSE LENGTH=390	alkaloid biosynthetic process; biosynthetic process	strictosidine synthase activity	Strictosidine synthase
Glyma.13G311200	Gm13	40661534	40670702	UniRef100_UPI00019624EC PREDICTED: putative axial regulator YABBY 2-like isoform X2 n=1 Tax=Glycine max RepID=UPI00019624EC	UniRef100_K9P2Z3 YABBY2-like transcription factor YAB2 n=1 Tax=Morella rubra RepID=K9P2Z3_9ROSI	AT1G08465.1|Symbols:YAB2|Plant-specific transcription factor YABBY family protein|chr1:2676033-2679382 FORWARD LENGTH=184	abaxial cell fate specification	sequence-specific DNA binding transcription factor activity	YABBY protein
Glyma.13G311300	Gm13	40676771	40686883	UniRef100_K7M2Y2 Ubiquitin carboxyl-terminal hydrolase n=1 Tax=Glycine max RepID=K7M2Y2_SOYBN	UniRef100_K7M2Y2 Ubiquitin carboxyl-terminal hydrolase n=1 Tax=Glycine max RepID=K7M2Y2_SOYBN	AT5G22030.1|Symbols:UBP8|ubiquitin-specific protease 8|chr5:7290155-7296344 REVERSE LENGTH=913	ubiquitin-dependent protein catabolic process	ubiquitin-specific protease activity; ubiquitin thiolesterase activity	Ubiquitin carboxyl-terminal hydrolase
Glyma.13G311400	Gm13	40689747	40691833	UniRef100_G7ZWR1 Putative uncharacterized protein n=1 Tax=Medicago truncatula RepID=G7ZWR1_MEDTR	UniRef100_G7K6U6 Replication protein A 70 kDa DNA-binding subunit n=1 Tax=Medicago truncatula RepID=G7K6U6_MEDTR	NA	NA	NA	NA
Glyma.13G311500	Gm13	40691920	40694296	UniRef100_C6TFA8 Uncharacterized protein n=1 Tax=Glycine max RepID=C6TFA8_SOYBN	UniRef100_F4YFC2 Phosphatidylglycerol/phosphatidylinositol transfer protein n=1 Tax=Camellia sinensis RepID=F4YFC2_CAMSI	AT3G44100.1|Symbols:|MD-2-related lipid recognition domain-containing protein|chr3:15866162-15867273 REVERSE LENGTH=152	biological process	molecular function	ML domain
Glyma.13G311600	Gm13	40695198	40697649	UniRef100_C6TLB6 Uncharacterized protein n=1 Tax=Glycine max RepID=C6TLB6_SOYBN	UniRef100_A9QTH2 DnaJ n=1 Tax=Viola baoshanensis RepID=A9QTH2_9ROSI	AT5G22060.1|Symbols:ATJ2, J2|DNAJ homologue 2|chr5:7303798-7305668 REVERSE LENGTH=419	N-terminal protein myristoylation; protein folding; response to heat; response to high light intensity; response to hydrogen peroxide	ATP binding; heat shock protein binding; unfolded protein binding	DnaJ central domain; DnaJ domain; DnaJ C terminal domain
Glyma.13G311700	Gm13	40700938	40707433	UniRef100_I1M480 Uncharacterized protein n=1 Tax=Glycine max RepID=I1M480_SOYBN	UniRef100_J7LJM0 IQ-DOMAIN 1-like isoform 3 n=1 Tax=Glycine max RepID=J7LJM0_SOYBN	AT3G22190.2|Symbols:IQD5|IQ-domain 5|chr3:7831280-7833512 REVERSE LENGTH=422	biological process	calmodulin binding	IQ calmodulin-binding motif
Glyma.13G311800	Gm13	40708139	40711166	UniRef100_I1M482 Uncharacterized protein n=1 Tax=Glycine max RepID=I1M482_SOYBN	UniRef100_Q9C581 Core-2/I-branching beta-1,6-N-acetylglucosaminyltransferase family protein n=2 Tax=Arabidopsis thaliana RepID=Q9C581_ARATH	AT5G22070.1|Symbols:|Core-2/I-branching beta-1,6-N-acetylglucosaminyltransferase family protein|chr5:7308255-7309343 FORWARD LENGTH=362	NA	transferase activity, transferring glycosyl groups	Core-2/I-Branching enzyme
Glyma.13G311900	Gm13	40709369	40710096	NA	NA	NA	NA	NA	NA
Glyma.13G312000	Gm13	40717266	40721905	UniRef100_I1M484 Uncharacterized protein n=3 Tax=Glycine max RepID=I1M484_SOYBN	UniRef100_G7IRF9 Outer envelope protein of 80 kDa n=1 Tax=Medicago truncatula RepID=G7IRF9_MEDTR	AT3G44160.1|Symbols:|Outer membrane OMP85 family protein|chr3:15889225-15891814 REVERSE LENGTH=362	N-terminal protein myristoylation	molecular function	Surface antigen
Glyma.13G312100	Gm13	40721652	40729349	UniRef100_I1M485 Uncharacterized protein n=3 Tax=Glycine max RepID=I1M485_SOYBN	UniRef100_G7L867 tRNA-specific adenosine deaminase-like protein n=1 Tax=Medicago truncatula RepID=G7L867_MEDTR	AT5G24670.1|Symbols:|Cytidine/deoxycytidylate deaminase family protein|chr5:8448880-8451046 FORWARD LENGTH=400	NA	catalytic activity; hydrolase activity; zinc ion binding	Cytidine and deoxycytidylate deaminase zinc-binding region
Glyma.13G312200	Gm13	40730888	40735478	UniRef100_I1M487 Uncharacterized protein n=1 Tax=Glycine max RepID=I1M487_SOYBN	UniRef100_G7JES9 Large subunit GTPase-like protein n=1 Tax=Medicago truncatula RepID=G7JES9_MEDTR	AT1G08410.1|Symbols:|P-loop containing nucleoside triphosphate hydrolases superfamily protein|chr1:2646307-2649106 FORWARD LENGTH=589	biological process	GTP binding	50S ribosome-binding GTPase
Glyma.13G312300	Gm13	40744377	40756946	UniRef100_UPI0001B09212 PREDICTED: serine/threonine-protein phosphatase BSL3 isoform X1 n=1 Tax=Glycine max RepID=UPI0001B09212	UniRef100_G7IRF4 Serine/threonine protein phosphatase n=1 Tax=Medicago truncatula RepID=G7IRF4_MEDTR	AT1G08420.1|Symbols:BSL2|BRI1 suppressor 1 (BSU1)-like 2|chr1:2649959-2656564 FORWARD LENGTH=1018	NA	hydrolase activity; iron ion binding; manganese ion binding; phosphoprotein phosphatase activity; protein serine/threonine phosphatase activity	Kelch motif; Calcineurin-like phosphoesterase
Glyma.13G312400	Gm13	40757045	40762412	UniRef100_I1M488 Uncharacterized protein n=1 Tax=Glycine max RepID=I1M488_SOYBN	UniRef100_G7IRF3 DnaJ homolog subfamily C member n=1 Tax=Medicago truncatula RepID=G7IRF3_MEDTR	AT5G22080.1|Symbols:|Chaperone DnaJ-domain superfamily protein|chr5:7310600-7313540 REVERSE LENGTH=246	protein folding	heat shock protein binding	DnaJ domain
Glyma.13G312500	Gm13	40765551	40767445	UniRef100_I1M489 Uncharacterized protein n=1 Tax=Glycine max RepID=I1M489_SOYBN	UniRef100_Q0V865 Protein FAF-like, chloroplastic n=1 Tax=Arabidopsis thaliana RepID=FAFL_ARATH	AT5G22090.2|Symbols:|Protein of unknown function (DUF3049)|chr5:7315003-7316394 REVERSE LENGTH=463	biological process	molecular function	Protein of unknown function (DUF3049)
Glyma.13G312600	Gm13	40780916	40784110	UniRef100_I1M490 Uncharacterized protein n=1 Tax=Glycine max RepID=I1M490_SOYBN	UniRef100_D7L966 Pentatricopeptide repeat-containing protein n=1 Tax=Arabidopsis lyrata subsp. lyrata RepID=D7L966_ARALL	AT3G18970.1|Symbols:MEF20|mitochondrial editing factor 20|chr3:6543699-6545117 REVERSE LENGTH=472	mitochondrial mRNA modification	molecular function	PPR repeat
Glyma.13G312700	Gm13	40788194	40790353	UniRef100_I1M491 Uncharacterized protein n=1 Tax=Glycine max RepID=I1M491_SOYBN	UniRef100_G7IHK3 U-box domain-containing protein n=1 Tax=Medicago truncatula RepID=G7IHK3_MEDTR	AT2G35930.1|Symbols:PUB23|plant U-box 23|chr2:15083101-15084336 REVERSE LENGTH=411	MAPK cascade; cellular membrane fusion; defense response; defense response to bacterium; defense response to fungus; intracellular signal transduction; jasmonic acid mediated signaling pathway; negative regulation of defense response; negative regulation of programmed cell death; protein autoubiquitination; protein targeting to membrane; protein ubiquitination; regulation of hydrogen peroxide met…	ubiquitin-protein ligase activity	U-box domain
Glyma.13G312800	Gm13	40797465	40799085	UniRef100_I1M492 Uncharacterized protein n=1 Tax=Glycine max RepID=I1M492_SOYBN	UniRef100_B9IIL0 U-box domain-containing family protein n=1 Tax=Populus trichocarpa RepID=B9IIL0_POPTR	AT2G35930.1|Symbols:PUB23|plant U-box 23|chr2:15083101-15084336 REVERSE LENGTH=411	MAPK cascade; cellular membrane fusion; defense response; defense response to bacterium; defense response to fungus; intracellular signal transduction; jasmonic acid mediated signaling pathway; negative regulation of defense response; negative regulation of programmed cell death; protein autoubiquitination; protein targeting to membrane; protein ubiquitination; regulation of hydrogen peroxide met…	ubiquitin-protein ligase activity	U-box domain
Glyma.13G312900	Gm13	40803230	40808367	UniRef100_I1M493 Uncharacterized protein n=1 Tax=Glycine max RepID=I1M493_SOYBN	UniRef100_B9IIL1 BEL1-like homeodomain 1 family protein n=1 Tax=Populus trichocarpa RepID=B9IIL1_POPTR	AT2G35940.3|Symbols:BLH1|BEL1-like homeodomain 1|chr2:15089171-15091699 REVERSE LENGTH=680	cysteine biosynthetic process; ethylene mediated signaling pathway; organ development; polar nucleus fusion; positive regulation of flavonoid biosynthetic process; protein targeting to membrane; regulation of plant-type hypersensitive response; regulation of transcription, DNA-dependent; response to abscisic acid stimulus; response to auxin stimulus; response to carbohydrate stimulus; response to…	DNA binding; protein heterodimerization activity; protein homodimerization activity; sequence-specific DNA binding; sequence-specific DNA binding transcription factor activity	Associated with HOX; Homeobox domain
Glyma.13G313000	Gm13	40847341	40854727	UniRef100_I1M494 Uncharacterized protein n=1 Tax=Glycine max RepID=I1M494_SOYBN	UniRef100_A2Q2N8 Helix-loop-helix DNA-binding (Fragment) n=1 Tax=Medicago truncatula RepID=A2Q2N8_MEDTR	AT2G27230.2|Symbols:LHW|transcription factor-related|chr2:11650895-11653840 FORWARD LENGTH=650	chromatin silencing; covalent chromatin modification; determination of bilateral symmetry; flower morphogenesis; gene silencing by RNA; leaf morphogenesis; maintenance of root meristem identity; meristem initiation; meristem maintenance; negative regulation of biological process; organ morphogenesis; positive regulation of transcription, DNA-dependent; regulation of transcription, DNA-dependent; …	protein homodimerization activity; sequence-specific DNA binding transcription factor activity	NA
Glyma.13G313100	Gm13	40859477	40862477	UniRef100_I1M495 Uncharacterized protein n=1 Tax=Glycine max RepID=I1M495_SOYBN	UniRef100_Q2HSI2 Protein kinase n=1 Tax=Medicago truncatula RepID=Q2HSI2_MEDTR	AT1G66150.1|Symbols:TMK1|transmembrane kinase 1|chr1:24631503-24634415 FORWARD LENGTH=942	protein phosphorylation; signal transduction	ATP binding; protein kinase activity; protein serine/threonine kinase activity; transferase activity, transferring phosphorus-containing groups; transmembrane receptor protein serine/threonine kinase activity	Protein tyrosine kinase
Glyma.13G313200	Gm13	40863551	40865337	UniRef100_K7M2Y7 Uncharacterized protein n=1 Tax=Glycine max RepID=K7M2Y7_SOYBN	UniRef100_Q2HSJ6 Pentatricopeptide repeat-containing protein n=1 Tax=Medicago truncatula RepID=Q2HSJ6_MEDTR	AT1G05750.1|Symbols:PDE247, CLB19|Tetratricopeptide repeat (TPR)-like superfamily protein|chr1:1721523-1723025 FORWARD LENGTH=500	RNA modification	NA	PPR repeat
Glyma.13G313300	Gm13	40865502	40866449	UniRef100_I1M497 Uncharacterized protein n=2 Tax=Glycine max RepID=I1M497_SOYBN	UniRef100_Q2HSJ7 Pentatricopeptide repeat-containing protein n=1 Tax=Medicago truncatula RepID=Q2HSJ7_MEDTR	AT4G16470.1|Symbols:|Tetratricopeptide repeat (TPR)-like superfamily protein|chr4:9287862-9289541 REVERSE LENGTH=501	biological process	NA	PPR repeat
Glyma.13G313400	Gm13	40867356	40867942	UniRef100_K7M2Y8 Uncharacterized protein n=1 Tax=Glycine max RepID=K7M2Y8_SOYBN	UniRef100_I2FFU6 CLAVATA3 protein n=1 Tax=Lotus japonicus RepID=I2FFU6_LOTJA	NA	NA	NA	NA
Glyma.13G313500	Gm13	40881408	40889061	UniRef100_K7M2Y9 Uncharacterized protein n=1 Tax=Glycine max RepID=K7M2Y9_SOYBN	UniRef100_Q2HSJ8 Protein kinase n=1 Tax=Medicago truncatula RepID=Q2HSJ8_MEDTR	AT3G44200.1|Symbols:ATNEK6, NEK6, IBO1|NIMA (never in mitosis, gene A)-related 6|chr3:15906788-15911365 FORWARD LENGTH=956	actin nucleation; cell adhesion; cell wall organization; cortical microtubule organization; epidermal cell differentiation; microtubule-based process; root hair cell differentiation; trichome morphogenesis	kinase activity; protein kinase activity	Protein kinase domain
Glyma.13G313600	Gm13	40891153	40892294	UniRef100_K7M2Z0 Uncharacterized protein n=1 Tax=Glycine max RepID=K7M2Z0_SOYBN	UniRef100_B9H9A1 Hydroxyproline-rich glycoprotein n=1 Tax=Populus trichocarpa RepID=B9H9A1_POPTR	AT2G27260.1|Symbols:|Late embryogenesis abundant (LEA) hydroxyproline-rich glycoprotein family|chr2:11669769-11670500 FORWARD LENGTH=243	biological process	molecular function	Late embryogenesis abundant protein
Glyma.13G313700	Gm13	40902956	40904226	UniRef100_I1M4A0 Uncharacterized protein n=1 Tax=Glycine max RepID=I1M4A0_SOYBN	UniRef100_G7IHG4 NHL1 n=1 Tax=Medicago truncatula RepID=G7IHG4_MEDTR	AT3G44220.1|Symbols:|Late embryogenesis abundant (LEA) hydroxyproline-rich glycoprotein family|chr3:15928216-15929645 FORWARD LENGTH=206	biological process	molecular function	Late embryogenesis abundant protein
Glyma.13G313800	Gm13	40919880	40920390	UniRef100_K7M2Z1 Uncharacterized protein n=1 Tax=Glycine max RepID=K7M2Z1_SOYBN	UniRef100_G7L6X5 MADS-box transcription factor n=1 Tax=Medicago truncatula RepID=G7L6X5_MEDTR	AT5G60440.1|Symbols:AGL62|AGAMOUS-like 62|chr5:24306329-24307520 FORWARD LENGTH=299	endosperm development	DNA binding; protein dimerization activity; sequence-specific DNA binding transcription factor activity	SRF-type transcription factor (DNA-binding and dimerisation domain)
Glyma.13G313900	Gm13	40929748	40930036	UniRef100_I1NG55 Uncharacterized protein n=1 Tax=Glycine max RepID=I1NG55_SOYBN	NA	NA	NA	NA	NA
Glyma.13G314000	Gm13	40933098	40934418	UniRef100_K7M2Z3 Uncharacterized protein n=1 Tax=Glycine max RepID=K7M2Z3_SOYBN	UniRef100_G7KBP5 Ovate protein n=1 Tax=Medicago truncatula RepID=G7KBP5_MEDTR	AT3G52525.1|Symbols:ATOFP6, OFP6|ovate family protein 6|chr3:19475159-19475638 FORWARD LENGTH=159	negative regulation of transcription, DNA-dependent	NA	Transcriptional repressor, ovate
Glyma.13G314100	Gm13	40937254	40938477	UniRef100_I1M4A3 Uncharacterized protein n=1 Tax=Glycine max RepID=I1M4A3_SOYBN	UniRef100_B9MYV0 CCR4-NOT transcription complex family protein n=1 Tax=Populus trichocarpa RepID=B9MYV0_POPTR	AT5G22250.1|Symbols:|Polynucleotidyl transferase, ribonuclease H-like superfamily protein|chr5:7365605-7366441 REVERSE LENGTH=278	MAPK cascade; RNA modification; abscisic acid mediated signaling pathway; defense response, incompatible interaction; defense response to bacterium; ethylene biosynthetic process; ethylene mediated signaling pathway; intracellular signal transduction; nuclear-transcribed mRNA poly(A) tail shortening; respiratory burst involved in defense response; response to chitin; vegetative to reproductive ph…	3'-5' exonuclease activity; nucleic acid binding; ribonuclease activity	CAF1 family ribonuclease
Glyma.13G314200	Gm13	40949752	40951896	UniRef100_I1M4A4 Uncharacterized protein n=1 Tax=Glycine max RepID=I1M4A4_SOYBN	UniRef100_Q9FNI1 Gb|AAF02129.1 n=1 Tax=Arabidopsis thaliana RepID=Q9FNI1_ARATH	AT5G06270.1|Symbols:|unknown protein; FUNCTIONS IN: molecular_function unknown; INVOLVED IN: biological_process unknown; LOCATED IN: chloroplast; EXPRESSED IN: 21 plant structures; EXPRESSED DURING: 11 growth stages; BEST Arabidopsis thaliana protein match is: unknown protein (TAIR:AT3G11600.1); Has 1807 Blast hits to 1807 proteins in 277 species: Archae - 0; Bacteria - 0; Metazoa - 736; Fungi - …	biological process	molecular function	NA
Glyma.13G314300	Gm13	40964940	40965184	UniRef100_I1LTY3 Uncharacterized protein n=1 Tax=Glycine max RepID=I1LTY3_SOYBN	UniRef100_Q9FNI1 Gb|AAF02129.1 n=1 Tax=Arabidopsis thaliana RepID=Q9FNI1_ARATH	AT5G06270.1|Symbols:|unknown protein; FUNCTIONS IN: molecular_function unknown; INVOLVED IN: biological_process unknown; LOCATED IN: chloroplast; EXPRESSED IN: 21 plant structures; EXPRESSED DURING: 11 growth stages; BEST Arabidopsis thaliana protein match is: unknown protein (TAIR:AT3G11600.1); Has 1807 Blast hits to 1807 proteins in 277 species: Archae - 0; Bacteria - 0; Metazoa - 736; Fungi - …	biological process	molecular function	NA
Glyma.13G314400	Gm13	40977943	40978908	UniRef100_I1M4A5 Uncharacterized protein n=1 Tax=Glycine max RepID=I1M4A5_SOYBN	UniRef100_Q9FNI1 Gb|AAF02129.1 n=1 Tax=Arabidopsis thaliana RepID=Q9FNI1_ARATH	AT3G11600.1|Symbols:|unknown protein; FUNCTIONS IN: molecular_function unknown; INVOLVED IN: response to karrikin; EXPRESSED IN: 21 plant structures; EXPRESSED DURING: 12 growth stages; BEST Arabidopsis thaliana protein match is: unknown protein (TAIR:AT5G06270.1); Has 171 Blast hits to 171 proteins in 15 species: Archae - 0; Bacteria - 0; Metazoa - 0; Fungi - 0; Plants - 171; Viruses - 0; Other …	response to karrikin	molecular function	NA
Glyma.13G314500	Gm13	40987411	40991169	UniRef100_C6T159 Uncharacterized protein n=1 Tax=Glycine max RepID=C6T159_SOYBN	UniRef100_G7IHH0 NAC domain protein n=1 Tax=Medicago truncatula RepID=G7IHH0_MEDTR	AT5G22280.1|Symbols:|unknown protein; FUNCTIONS IN: molecular_function unknown; INVOLVED IN: biological_process unknown; LOCATED IN: endomembrane system; EXPRESSED IN: 22 plant structures; EXPRESSED DURING: 13 growth stages; BEST Arabidopsis thaliana protein match is: unknown protein (TAIR:AT3G44280.1); Has 82 Blast hits to 82 proteins in 13 species: Archae - 0; Bacteria - 0; Metazoa - 0; Fungi -…	biological process	molecular function	NA
Glyma.13G314600	Gm13	40993081	40996703	UniRef100_K7M2Z6 Uncharacterized protein n=3 Tax=Glycine max RepID=K7M2Z6_SOYBN	UniRef100_G7IHH0 NAC domain protein n=1 Tax=Medicago truncatula RepID=G7IHH0_MEDTR	AT2G27300.1|Symbols:ANAC040, NTL8|NTM1-like 8|chr2:11680417-11681955 REVERSE LENGTH=335	embryo development ending in seed dormancy; lipid storage; meristem structural organization; multicellular organismal development; photomorphogenesis; protein ubiquitination; regulation of flower development; regulation of transcription, DNA-dependent; response to freezing; response to salt stress; seed dormancy process; seed germination; sugar mediated signaling pathway; terpenoid biosynthetic p…	DNA binding; sequence-specific DNA binding transcription factor activity	No apical meristem (NAM) protein
Glyma.13G314700	Gm13	40998351	40999331	UniRef100_I1M4A9 Uncharacterized protein n=2 Tax=Glycine max RepID=I1M4A9_SOYBN	UniRef100_G7IHH4 F-box family protein n=1 Tax=Medicago truncatula RepID=G7IHH4_MEDTR	AT2G27310.1|Symbols:|F-box family protein|chr2:11683954-11684967 REVERSE LENGTH=337	abscisic acid mediated signaling pathway; biological process; ethylene biosynthetic process; ethylene mediated signaling pathway; heat acclimation; hyperosmotic salinity response; intracellular signal transduction; respiratory burst involved in defense response; response to abscisic acid stimulus; response to chitin; response to ethylene stimulus; response to water deprivation	molecular function	NA
Glyma.13G314800	Gm13	41004969	41008993	UniRef100_C6TGI7 Uncharacterized protein n=1 Tax=Glycine max RepID=C6TGI7_SOYBN	UniRef100_G7IHH7 Protein phosphatase 1 regulatory subunit n=1 Tax=Medicago truncatula RepID=G7IHH7_MEDTR	AT5G22320.1|Symbols:|Leucine-rich repeat (LRR) family protein|chr5:7388175-7390426 REVERSE LENGTH=452	biological process; embryo sac egg cell differentiation	NA	NA
Glyma.13G314900	Gm13	41018298	41024037	UniRef100_C6T9S3 Uncharacterized protein n=1 Tax=Glycine max RepID=C6T9S3_SOYBN	UniRef100_G7IHH9 mRNA-decapping enzyme-like protein n=1 Tax=Medicago truncatula RepID=G7IHH9_MEDTR	AT1G08370.1|Symbols:DCP1, ATDCP1|decapping 1|chr1:2638355-2640367 FORWARD LENGTH=367	RNA processing; deadenylation-independent decapping of nuclear-transcribed mRNA; mitotic cell cycle	protein binding; protein homodimerization activity	Dcp1-like decapping family
Glyma.13G315000	Gm13	41028031	41029272	UniRef100_I1M4B2 Uncharacterized protein n=1 Tax=Glycine max RepID=I1M4B2_SOYBN	UniRef100_C6T4E0 Casparian strip membrane protein 5 n=1 Tax=Glycine max RepID=CASP5_SOYBN	AT2G27370.1|Symbols:|Uncharacterised protein family (UPF0497)|chr2:11708628-11709905 REVERSE LENGTH=221	cell-cell junction assembly; cell wall modification	protein binding; protein homodimerization activity	Domain of unknown function (DUF588)
Glyma.13G315100	Gm13	41029988	41035004	UniRef100_I1M4B3 Uncharacterized protein n=1 Tax=Glycine max RepID=I1M4B3_SOYBN	UniRef100_Q93YN4 Mitochondrial fission protein ELM1 n=2 Tax=Arabidopsis thaliana RepID=ELM1_ARATH	AT5G22350.1|Symbols:ELM1|Protein of unknown function (DUF1022)|chr5:7397762-7400746 REVERSE LENGTH=427	mitochondrial fission; protein localization to organelle	NA	Mitochondrial fission ELM1
Glyma.13G315200	Gm13	41035905	41037849	UniRef100_I1M4B4 Uncharacterized protein n=1 Tax=Glycine max RepID=I1M4B4_SOYBN	UniRef100_G7IHF5 Capsanthin/capsorubin synthase, chromoplast n=1 Tax=Medicago truncatula RepID=G7IHF5_MEDTR	AT3G10230.1|Symbols:LYC|lycopene cyclase|chr3:3164340-3165845 REVERSE LENGTH=501	carotene biosynthetic process; carotenoid biosynthetic process	lycopene beta cyclase activity; oxidoreductase activity, acting on paired donors, with incorporation or reduction of molecular oxygen	Lycopene cyclase protein
Glyma.13G315300	Gm13	41041851	41044605	UniRef100_I1M4B5 Uncharacterized protein n=1 Tax=Glycine max RepID=I1M4B5_SOYBN	UniRef100_G7IHF4 NAC domain protein n=1 Tax=Medicago truncatula RepID=G7IHF4_MEDTR	AT5G22380.1|Symbols:anac090, NAC090|NAC domain containing protein 90|chr5:7408924-7410038 REVERSE LENGTH=235	multicellular organismal development; regulation of transcription, DNA-dependent	DNA binding; sequence-specific DNA binding transcription factor activity	No apical meristem (NAM) protein
Glyma.13G315400	Gm13	41047454	41049093	UniRef100_C6SZD3 Putative uncharacterized protein n=1 Tax=Glycine max RepID=C6SZD3_SOYBN	UniRef100_F4IFT4 Pollen Ole e 1 allergen and extensin family protein n=2 Tax=Arabidopsis thaliana RepID=F4IFT4_ARATH	AT2G27385.3|Symbols:|Pollen Ole e 1 allergen and extensin family protein|chr2:11716697-11717285 REVERSE LENGTH=162	biological process	molecular function	Pollen proteins Ole e I like
Glyma.13G315500	Gm13	41052365	41053871	UniRef100_I1M4B6 Uncharacterized protein n=1 Tax=Glycine max RepID=I1M4B6_SOYBN	UniRef100_G2XMF0 Hypothetical_protein n=1 Tax=Oryza brachyantha RepID=G2XMF0_ORYBR	AT5G09225.1|Symbols:|unknown protein; FUNCTIONS IN: molecular_function unknown; INVOLVED IN: biological_process unknown; LOCATED IN: endomembrane system; Has 35333 Blast hits to 34131 proteins in 2444 species: Archae - 798; Bacteria - 22429; Metazoa - 974; Fungi - 991; Plants - 531; Viruses - 0; Other Eukaryotes - 9610 (source: NCBI BLink).|chr5:2869556-2870379 REVERSE LENGTH=68	biological process	molecular function	NA
Glyma.13G315600	Gm13	41055987	41056424	UniRef100_K7M2Z9 Uncharacterized protein n=1 Tax=Glycine max RepID=K7M2Z9_SOYBN	NA	NA	NA	NA	NA
Glyma.13G315700	Gm13	41059262	41060459	UniRef100_K7M300 Uncharacterized protein n=1 Tax=Glycine max RepID=K7M300_SOYBN	NA	AT3G15040.1|Symbols:|Protein of unknown function, DUF584|chr3:5065445-5066176 REVERSE LENGTH=243	biological process	molecular function	Senescence regulator
Glyma.13G315800	Gm13	41066946	41070778	UniRef100_I1M4B9 Uncharacterized protein n=1 Tax=Glycine max RepID=I1M4B9_SOYBN	UniRef100_G7ITU5 N-carbamoylputrescine amidase n=1 Tax=Medicago truncatula RepID=G7ITU5_MEDTR	AT2G27450.1|Symbols:NLP1, ATNLP1, CPA|nitrilase-like protein 1|chr2:11737666-11739577 REVERSE LENGTH=299	nitrogen compound metabolic process; polyamine biosynthetic process; putrescine biosynthetic process	N-carbamoylputrescine amidase activity; hydrolase activity, acting on carbon-nitrogen (but not peptide) bonds	Carbon-nitrogen hydrolase
Glyma.13G315900	Gm13	41074147	41075194	UniRef100_I1M4C0 Uncharacterized protein n=1 Tax=Glycine max RepID=I1M4C0_SOYBN	NA	AT5G22390.1|Symbols:|Protein of unknown function (DUF3049)|chr5:7418383-7418991 REVERSE LENGTH=202	NA	NA	Protein of unknown function (DUF3049)
Glyma.13G316000	Gm13	41077356	41081233	UniRef100_I1M4C1 Uncharacterized protein n=1 Tax=Glycine max RepID=I1M4C1_SOYBN	UniRef100_G7ITU3 Rho GTPase activating protein n=1 Tax=Medicago truncatula RepID=G7ITU3_MEDTR	AT5G22400.1|Symbols:|Rho GTPase activating protein with PAK-box/P21-Rho-binding domain|chr5:7423050-7425335 REVERSE LENGTH=466	signal transduction	Rac GTPase activator activity	RhoGAP domain; P21-Rho-binding domain
Glyma.13G316100	Gm13	41088129	41090704	UniRef100_I1M4C2 Uncharacterized protein n=2 Tax=Glycine max RepID=I1M4C2_SOYBN	UniRef100_G7ITU0 Calpain-B n=2 Tax=Medicago truncatula RepID=G7ITU0_MEDTR	AT2G27480.1|Symbols:|Calcium-binding EF-hand family protein|chr2:11746811-11747885 FORWARD LENGTH=228	biological process	calcium ion binding	NA
Glyma.13G316200	Gm13	41093161	41098205	UniRef100_I1M4C5 Uncharacterized protein n=1 Tax=Glycine max RepID=I1M4C5_SOYBN	UniRef100_E9N6U0 1,3-beta-D-glucanase GH17_61 n=1 Tax=Populus tremula x Populus tremuloides RepID=E9N6U0_9ROSI	AT2G27500.1|Symbols:|Glycosyl hydrolase superfamily protein|chr2:11752364-11753844 REVERSE LENGTH=392	carbohydrate metabolic process; jasmonic acid mediated signaling pathway; protein targeting to membrane; regulation of plant-type hypersensitive response; salicylic acid mediated signaling pathway	catalytic activity; cation binding; hydrolase activity, hydrolyzing O-glycosyl compounds	Glycosyl hydrolases family 17
Glyma.13G316300	Gm13	41095431	41095619	UniRef100_K7M301 Uncharacterized protein n=1 Tax=Glycine max RepID=K7M301_SOYBN	NA	NA	NA	NA	NA
Glyma.13G316400	Gm13	41110490	41112614	UniRef100_C6T552 Ribosomal protein (Fragment) n=1 Tax=Glycine max RepID=C6T552_SOYBN	UniRef100_C6T552 Ribosomal protein (Fragment) n=1 Tax=Glycine max RepID=C6T552_SOYBN	AT1G08360.1|Symbols:|Ribosomal protein L1p/L10e family|chr1:2636231-2637694 FORWARD LENGTH=216	translation	RNA binding; structural constituent of ribosome	Ribosomal protein L1p/L10e family
Glyma.13G316500	Gm13	41114671	41115493	UniRef100_C6T1U3 Uncharacterized protein n=1 Tax=Glycine max RepID=C6T1U3_SOYBN	UniRef100_G7ITT2 Soft fertilization envelope protein n=1 Tax=Medicago truncatula RepID=G7ITT2_MEDTR	AT3G44450.1|Symbols:|unknown protein; BEST Arabidopsis thaliana protein match is: unknown protein (TAIR:AT3G52740.1); Has 63 Blast hits to 63 proteins in 12 species: Archae - 0; Bacteria - 0; Metazoa - 0; Fungi - 0; Plants - 63; Viruses - 0; Other Eukaryotes - 0 (source: NCBI BLink).|chr3:16074228-16074578 REVERSE LENGTH=116	response to karrikin	molecular function	NA
Glyma.13G316600	Gm13	41119435	41123061	UniRef100_K7M304 Uncharacterized protein n=1 Tax=Glycine max RepID=K7M304_SOYBN	UniRef100_B9IPM9 Myb family transcription factor family protein n=1 Tax=Populus trichocarpa RepID=B9IPM9_POPTR	AT3G04030.3|Symbols:|Homeodomain-like superfamily protein|chr3:1042920-1044574 REVERSE LENGTH=394	NA	sequence-specific DNA binding transcription factor activity	Myb-like DNA-binding domain
Glyma.13G316700	Gm13	41130235	41133702	UniRef100_C6TB57 Putative uncharacterized protein n=1 Tax=Glycine max RepID=C6TB57_SOYBN	UniRef100_Q9SQQ8 T11I18.15 protein n=1 Tax=Arabidopsis thaliana RepID=Q9SQQ8_ARATH	AT5G18250.1|Symbols:|unknown protein; FUNCTIONS IN: molecular_function unknown; INVOLVED IN: biological_process unknown; LOCATED IN: mitochondrion; EXPRESSED IN: 23 plant structures; EXPRESSED DURING: 13 growth stages; BEST Arabidopsis thaliana protein match is: unknown protein (TAIR:AT3G04040.1); Has 1807 Blast hits to 1807 proteins in 277 species: Archae - 0; Bacteria - 0; Metazoa - 736; Fungi …	biological process	molecular function	NA
Glyma.13G316800	Gm13	41134788	41134937	UniRef100_K7M305 Uncharacterized protein n=1 Tax=Glycine max RepID=K7M305_SOYBN	NA	NA	NA	NA	NA
Glyma.13G316900	Gm13	41139769	41147330	UniRef100_UPI0003DE86E2 PREDICTED: TGACG-sequence-specific DNA-binding protein TGA-2.1 isoform X2 n=1 Tax=Glycine max RepID=UPI0003DE86E2	UniRef100_G7ITS6 BZIP transcription factor n=1 Tax=Medicago truncatula RepID=G7ITS6_MEDTR	AT1G08320.3|Symbols:TGA9, bZIP21|bZIP transcription factor family protein|chr1:2622113-2627451 REVERSE LENGTH=481	calcium-mediated signaling; regulation of transcription, DNA-dependent; response to mechanical stimulus	DNA binding; protein dimerization activity; sequence-specific DNA binding; sequence-specific DNA binding transcription factor activity	bZIP transcription factor
Glyma.13G317000	Gm13	41148922	41151182	UniRef100_K7M309 Uncharacterized protein n=1 Tax=Glycine max RepID=K7M309_SOYBN	UniRef100_G7ITR9 Abscisic acid insensitive n=1 Tax=Medicago truncatula RepID=G7ITR9_MEDTR	AT3G44460.1|Symbols:DPBF2, AtbZIP67|Basic-leucine zipper (bZIP) transcription factor family protein|chr3:16080115-16081722 REVERSE LENGTH=331	abscisic acid mediated signaling pathway; endoplasmic reticulum unfolded protein response; positive regulation of transcription, DNA-dependent; regulation of transcription, DNA-dependent; response to xenobiotic stimulus	DNA binding; activating transcription factor binding; protein dimerization activity; sequence-specific DNA binding; sequence-specific DNA binding transcription factor activity	bZIP transcription factor
Glyma.13G317100	Gm13	41160519	41161629	UniRef100_K7M310 Uncharacterized protein n=1 Tax=Glycine max RepID=K7M310_SOYBN	UniRef100_G7Z0B6 CENTRORADIALIS-like protein 3 n=2 Tax=Glycine max RepID=G7Z0B6_SOYBN	AT2G27550.1|Symbols:ATC|centroradialis|chr2:11773417-11774509 FORWARD LENGTH=175	negative regulation of flower development; transition metal ion transport; vegetative to reproductive phase transition of meristem	phosphatidylethanolamine binding	Phosphatidylethanolamine-binding protein
Glyma.13G317200	Gm13	41173745	41177372	UniRef100_I1M4D8 Uncharacterized protein n=1 Tax=Glycine max RepID=I1M4D8_SOYBN	UniRef100_G7ITQ8 Protein TRANSPARENT TESTA n=1 Tax=Medicago truncatula RepID=G7ITQ8_MEDTR	AT1G08290.1|Symbols:WIP3|WIP domain protein 3|chr1:2610680-2613180 REVERSE LENGTH=337	regulation of transcription, DNA-dependent	nucleic acid binding; sequence-specific DNA binding transcription factor activity; zinc ion binding	NA
Glyma.13G317300	Gm13	41201364	41206334	UniRef100_I1LTU5 Uncharacterized protein n=1 Tax=Glycine max RepID=I1LTU5_SOYBN	UniRef100_T2HVY3 Vacuolar protein sorting-associated protein 4-like n=1 Tax=Cucumis sativus var. sativus RepID=T2HVY3_CUCSA	AT2G27600.1|Symbols:SKD1, VPS4, ATSKD1|AAA-type ATPase family protein|chr2:11781226-11783730 FORWARD LENGTH=435	cellular membrane fusion; endosomal transport; endosome organization; fatty acid beta-oxidation; intra-Golgi vesicle-mediated transport; lipid transport; lithium ion transport; protein import into peroxisome matrix; protein targeting to vacuole; trichome branching; vacuole organization; vesicle-mediated transport	ATP binding; nucleoside-triphosphatase activity; nucleotide binding; protein binding	MIT (microtubule interacting and transport) domain; Vps4 C terminal oligomerisation domain; ATPase family associated with various cellular activities (AAA)
Glyma.13G317400	Gm13	41208254	41210584	UniRef100_K7M315 Uncharacterized protein n=1 Tax=Glycine max RepID=K7M315_SOYBN	UniRef100_G7ITP9 Pentatricopeptide repeat-containing protein n=1 Tax=Medicago truncatula RepID=G7ITP9_MEDTR	AT2G27610.1|Symbols:|Tetratricopeptide repeat (TPR)-like superfamily protein|chr2:11783927-11786533 REVERSE LENGTH=868	biological process	molecular function	PPR repeat
Glyma.13G317500	Gm13	41211525	41219672	UniRef100_K7M317 Uncharacterized protein n=1 Tax=Glycine max RepID=K7M317_SOYBN	UniRef100_G7ITP8 Histone transcription regulator HIRA n=2 Tax=Medicago truncatula RepID=G7ITP8_MEDTR	AT3G44530.2|Symbols:HIRA|homolog of histone chaperone HIRA|chr3:16116026-16121247 FORWARD LENGTH=1040	negative regulation of gene expression, epigenetic; regulation of transcription, DNA-dependent	nucleotide binding; protein binding	WD domain, G-beta repeat; TUP1-like enhancer of split
Glyma.13G317600	Gm13	41226760	41233924	UniRef100_K7M318 Uncharacterized protein n=1 Tax=Glycine max RepID=K7M318_SOYBN	UniRef100_G7IRD9 Fatty acyl-CoA reductase n=1 Tax=Medicago truncatula RepID=G7IRD9_MEDTR	AT4G33790.1|Symbols:CER4, G7, FAR3|Jojoba acyl CoA reductase-related male sterility protein|chr4:16204325-16207891 REVERSE LENGTH=493	microsporogenesis; oxidation-reduction process; wax biosynthetic process	fatty-acyl-CoA reductase (alcohol-forming) activity; nucleotide binding; oxidoreductase activity, acting on the CH-CH group of donors; oxidoreductase activity, acting on the aldehyde or oxo group of donors, NAD or NADP as acceptor	Male sterility protein; Male sterility protein
Glyma.13G317700	Gm13	41237108	41241891	UniRef100_I1M4E4 Uncharacterized protein n=2 Tax=Glycine max RepID=I1M4E4_SOYBN	UniRef100_G7IRD9 Fatty acyl-CoA reductase n=1 Tax=Medicago truncatula RepID=G7IRD9_MEDTR	AT4G33790.1|Symbols:CER4, G7, FAR3|Jojoba acyl CoA reductase-related male sterility protein|chr4:16204325-16207891 REVERSE LENGTH=493	microsporogenesis; oxidation-reduction process; wax biosynthetic process	fatty-acyl-CoA reductase (alcohol-forming) activity; nucleotide binding; oxidoreductase activity, acting on the CH-CH group of donors; oxidoreductase activity, acting on the aldehyde or oxo group of donors, NAD or NADP as acceptor	Male sterility protein; Male sterility protein
Glyma.13G317800	Gm13	41242155	41247233	UniRef100_I1M4E5 Uncharacterized protein n=1 Tax=Glycine max RepID=I1M4E5_SOYBN	UniRef100_Q680B9 Proteinaceous RNase P 2 n=1 Tax=Arabidopsis thaliana RepID=PRRP2_ARATH	AT2G16650.1|Symbols:PRORP2|proteinaceous RNase P 2|chr2:7215937-7218061 REVERSE LENGTH=528	mRNA processing; snoRNA processing; tRNA 5'-leader removal	ribonuclease P activity	Zc3h12a-like Ribonuclease NYN domain
Glyma.13G317900	Gm13	41250279	41252854	UniRef100_K7M321 Uncharacterized protein n=2 Tax=Glycine max RepID=K7M321_SOYBN	UniRef100_H6UGX3 Histidine-containing phosphotransfer protein n=1 Tax=Wolffia australiana RepID=H6UGX3_9ARAE	AT3G21510.1|Symbols:AHP1|histidine-containing phosphotransmitter 1|chr3:7578432-7579537 REVERSE LENGTH=154	cell division; cell growth; cytokinin mediated signaling pathway; embryo sac development; inorganic anion transport; phosphorelay signal transduction system; regulation of anthocyanin metabolic process; regulation of cytokinin mediated signaling pathway; regulation of seed germination; regulation of shoot system development; transition metal ion transport	histidine phosphotransfer kinase activity; protein binding; protein histidine kinase binding; signal transducer activity	NA
Glyma.13G318000	Gm13	41254740	41259115	UniRef100_I1M4E6 Uncharacterized protein n=1 Tax=Glycine max RepID=I1M4E6_SOYBN	UniRef100_D7LJ14 Aldo/keto reductase family protein n=1 Tax=Arabidopsis lyrata subsp. lyrata RepID=D7LJ14_ARALL	AT2G27680.1|Symbols:|NAD(P)-linked oxidoreductase superfamily protein|chr2:11803981-11805965 REVERSE LENGTH=384	aromatic amino acid family metabolic process; carotenoid biosynthetic process; cellular amino acid biosynthetic process; chlorophyll biosynthetic process; chloroplast relocation; coenzyme biosynthetic process; glucosinolate biosynthetic process; glycine catabolic process; isopentenyl diphosphate biosynthetic process, mevalonate-independent pathway; jasmonic acid biosynthetic process; lipoate meta…	aldo-keto reductase (NADP) activity	Aldo/keto reductase family
Glyma.13G318100	Gm13	41259525	41263880	UniRef100_I1M4E7 Uncharacterized protein n=1 Tax=Glycine max RepID=I1M4E7_SOYBN	NA	AT4G04190.2|Symbols:|unknown protein; Has 35333 Blast hits to 34131 proteins in 2444 species: Archae - 798; Bacteria - 22429; Metazoa - 974; Fungi - 991; Plants - 531; Viruses - 0; Other Eukaryotes - 9610 (source: NCBI BLink).|chr4:2024873-2026330 FORWARD LENGTH=184	biological process	molecular function	NA
Glyma.13G318200	Gm13	41265115	41266746	UniRef100_K7M324 Uncharacterized protein n=1 Tax=Glycine max RepID=K7M324_SOYBN	UniRef100_Q5YJR8 60S acidic ribosomal protein n=1 Tax=Hyacinthus orientalis RepID=Q5YJR8_HYAOR	AT3G44590.1|Symbols:|60S acidic ribosomal protein family|chr3:16163983-16164658 FORWARD LENGTH=111	RNA methylation; translational elongation	structural constituent of ribosome	60s Acidic ribosomal protein
Glyma.13G318300	Gm13	41269055	41274970	UniRef100_I1M4E9 Uncharacterized protein n=1 Tax=Glycine max RepID=I1M4E9_SOYBN	UniRef100_B9HQV4 Peptidyl-prolyl cis-trans isomerase cyclophilin-type family protein n=1 Tax=Populus trichocarpa RepID=B9HQV4_POPTR	AT3G44600.1|Symbols:CYP71|cyclophilin71|chr3:16165368-16169201 REVERSE LENGTH=631	DNA methylation; DNA recombination; RNA processing; actin nucleation; carpel development; cell adhesion; cell wall organization; chromatin organization; cullin deneddylation; determination of bilateral symmetry; embryo development ending in seed dormancy; embryo sac egg cell differentiation; floral organ formation; gene silencing by RNA; histone H3-K9 methylation; histone methylation; histone mod…	chromatin binding; histone binding; peptidyl-prolyl cis-trans isomerase activity	WD domain, G-beta repeat; Cyclophilin type peptidyl-prolyl cis-trans isomerase/CLD
Glyma.13G318400	Gm13	41276760	41281032	UniRef100_UPI0003DE9ABD PREDICTED: serine/threonine-protein kinase AtPK7-like isoform X2 n=1 Tax=Glycine max RepID=UPI0003DE9ABD	UniRef100_Q0WN21 Protein kinase like protein n=1 Tax=Arabidopsis thaliana RepID=Q0WN21_ARATH	AT3G44610.1|Symbols:|Protein kinase superfamily protein|chr3:16188266-16192107 REVERSE LENGTH=451	protein phosphorylation	ATP binding; kinase activity; protein kinase activity; protein serine/threonine kinase activity; transferase activity, transferring phosphorus-containing groups	Protein kinase domain
Glyma.13G318500	Gm13	41292696	41293427	UniRef100_UPI000233AAC3 PREDICTED: dehydration-responsive element-binding protein 1F-like n=1 Tax=Glycine max RepID=UPI000233AAC3	UniRef100_A9PL47 C-repeat binding facor 6 n=1 Tax=Populus trichocarpa RepID=A9PL47_POPTR	AT4G25470.1|Symbols:CBF2, DREB1C, FTQ4, ATCBF2|C-repeat/DRE binding factor 2|chr4:13015436-13016086 REVERSE LENGTH=216	cold acclimation; regulation of transcription, DNA-dependent; response to cold	DNA binding; sequence-specific DNA binding transcription factor activity	AP2 domain
Glyma.13G318600	Gm13	41298869	41300432	UniRef100_C6T019 Uncharacterized protein n=1 Tax=Glycine max RepID=C6T019_SOYBN	UniRef100_K0E184 Stress responsive A/B barrel domain family protein n=1 Tax=Populus tomentosa RepID=K0E184_POPTO	AT5G22580.1|Symbols:|Stress responsive A/B Barrel Domain|chr5:7502709-7503137 FORWARD LENGTH=111	biological process	molecular function	Stress responsive A/B Barrel Domain
Glyma.13G318700	Gm13	41311983	41314947	UniRef100_I1MS59 Uncharacterized protein n=2 Tax=Glycine max RepID=I1MS59_SOYBN	NA	AT2G27770.1|Symbols:|Plant protein of unknown function (DUF868)|chr2:11833089-11834051 REVERSE LENGTH=320	NA	NA	Plant protein of unknown function (DUF868)
Glyma.13G318800	Gm13	41326586	41328423	UniRef100_I1MS60 Uncharacterized protein n=1 Tax=Glycine max RepID=I1MS60_SOYBN	UniRef100_B9MYJ4 60S ribosomal protein L24 n=1 Tax=Populus trichocarpa RepID=B9MYJ4_POPTR	AT2G44860.2|Symbols:|Ribosomal protein L24e family protein|chr2:18501034-18502128 REVERSE LENGTH=159	RNA methylation; rRNA processing; ribosome biogenesis; translation	structural constituent of ribosome	Ribosomal protein L24e
Glyma.13G318900	Gm13	41337944	41344534	UniRef100_I1MS61 Uncharacterized protein n=1 Tax=Glycine max RepID=I1MS61_SOYBN	UniRef100_B9HQT7 Xanthine/uracil permease family protein n=1 Tax=Populus trichocarpa RepID=B9HQT7_POPTR	AT2G27810.1|Symbols:ATNAT12, NAT12|nucleobase-ascorbate transporter 12|chr2:11852338-11855988 FORWARD LENGTH=709	transmembrane transport; transport	transmembrane transporter activity; transporter activity	Permease family
Glyma.13G319000	Gm13	41357376	41359383	UniRef100_I1MS62 Uncharacterized protein n=1 Tax=Glycine max RepID=I1MS62_SOYBN	UniRef100_G7JKZ4 Arogenate dehydratase/prephenate dehydratase n=1 Tax=Medicago truncatula RepID=G7JKZ4_MEDTR	AT1G08250.1|Symbols:ADT6|arogenate dehydratase 6|chr1:2588994-2590235 REVERSE LENGTH=413	L-phenylalanine biosynthetic process; anthocyanin accumulation in tissues in response to UV light; carpel development; vernalization response	arogenate dehydratase activity; prephenate dehydratase activity	Prephenate dehydratase
Glyma.13G319100	Gm13	41360682	41362508	NA	NA	NA	NA	NA	NA
Glyma.13G319200	Gm13	41369865	41371722	UniRef100_I1MS63 Uncharacterized protein n=1 Tax=Glycine max RepID=I1MS63_SOYBN	UniRef100_A9P9C4 Phytosulfokines 6 family protein n=1 Tax=Populus trichocarpa RepID=A9P9C4_POPTR	AT3G44735.2|Symbols:PSK3|PHYTOSULFOKINE 3 PRECURSOR|chr3:16291388-16292118 REVERSE LENGTH=81	cell proliferation	growth factor activity	Phytosulfokine precursor protein (PSK)
Glyma.13G319300	Gm13	41372621	41379136	UniRef100_K7MJZ6 Uncharacterized protein n=1 Tax=Glycine max RepID=K7MJZ6_SOYBN	UniRef100_D7M1H5 EMB1211 n=1 Tax=Arabidopsis lyrata subsp. lyrata RepID=D7M1H5_ARALL	AT5G22640.1|Symbols:emb1211|MORN (Membrane Occupation and Recognition Nexus) repeat-containing protein|chr5:7529423-7533641 FORWARD LENGTH=871	asymmetric cell division; chloroplast organization; embryo development; embryo development ending in seed dormancy; iron-sulfur cluster assembly; ovule development; protein import into chloroplast stroma; thylakoid membrane organization; vegetative to reproductive phase transition of meristem	protein binding; protein transporter activity	MORN repeat
Glyma.13G319400	Gm13	41384163	41385848	UniRef100_C6TCK3 Uncharacterized protein n=1 Tax=Glycine max RepID=C6TCK3_SOYBN	NA	AT2G27830.1|Symbols:|unknown protein; BEST Arabidopsis thaliana protein match is: unknown protein (TAIR:AT4G22758.1); Has 131 Blast hits to 131 proteins in 17 species: Archae - 0; Bacteria - 0; Metazoa - 0; Fungi - 0; Plants - 131; Viruses - 0; Other Eukaryotes - 0 (source: NCBI BLink).|chr2:11860734-11861306 FORWARD LENGTH=190	autophagy	molecular function	NA
Glyma.13G319500	Gm13	41389443	41390877	UniRef100_K7MJZ7 Uncharacterized protein n=1 Tax=Glycine max RepID=K7MJZ7_SOYBN	UniRef100_Q8LJS2 Histone deacetylase HDT1 n=2 Tax=Glycine max RepID=HDT1_SOYBN	AT5G03740.1|Symbols:HD2C, HDT3|histone deacetylase 2C|chr5:981994-983961 FORWARD LENGTH=294	RNA methylation; cullin deneddylation; negative regulation of transcription, DNA-dependent; photomorphogenesis; response to abscisic acid stimulus; response to salt stress; response to water deprivation	histone deacetylase activity; nucleic acid binding; zinc ion binding	NA
Glyma.13G319600	Gm13	41398196	41403950	UniRef100_I1MS67 Uncharacterized protein n=1 Tax=Glycine max RepID=I1MS67_SOYBN	UniRef100_G7JM38 Glucomannan 4-beta-mannosyltransferase n=1 Tax=Medicago truncatula RepID=G7JM38_MEDTR	AT5G22740.1|Symbols:ATCSLA02, CSLA02, ATCSLA2, CSLA2|cellulose synthase-like A02|chr5:7555379-7559866 REVERSE LENGTH=534	NA	mannan synthase activity; transferase activity, transferring glycosyl groups	Glycosyl transferase family 2
Glyma.13G319700	Gm13	41414504	41418957	UniRef100_K7MJZ8 Uncharacterized protein n=1 Tax=Glycine max RepID=K7MJZ8_SOYBN	UniRef100_G7JM48 Lysine histidine transporter n=1 Tax=Medicago truncatula RepID=G7JM48_MEDTR	AT1G08230.2|Symbols:|Transmembrane amino acid transporter family protein|chr1:2583715-2586700 REVERSE LENGTH=451	gamma-aminobutyric acid transport	gamma-aminobutyric acid transmembrane transporter activity	Transmembrane amino acid transporter protein
Glyma.13G319800	Gm13	41425075	41431187	UniRef100_K7MJZ9 Uncharacterized protein n=1 Tax=Glycine max RepID=K7MJZ9_SOYBN	UniRef100_G7JM48 Lysine histidine transporter n=1 Tax=Medicago truncatula RepID=G7JM48_MEDTR	AT1G08230.2|Symbols:|Transmembrane amino acid transporter family protein|chr1:2583715-2586700 REVERSE LENGTH=451	gamma-aminobutyric acid transport	gamma-aminobutyric acid transmembrane transporter activity	Transmembrane amino acid transporter protein
Glyma.13G319900	Gm13	41432203	41436515	UniRef100_K7MK00 Uncharacterized protein n=1 Tax=Glycine max RepID=K7MK00_SOYBN	UniRef100_G7JM48 Lysine histidine transporter n=1 Tax=Medicago truncatula RepID=G7JM48_MEDTR	AT1G08230.2|Symbols:|Transmembrane amino acid transporter family protein|chr1:2583715-2586700 REVERSE LENGTH=451	gamma-aminobutyric acid transport	gamma-aminobutyric acid transmembrane transporter activity	Transmembrane amino acid transporter protein
Glyma.13G320000	Gm13	41438313	41446944	UniRef100_I1MS71 Uncharacterized protein n=1 Tax=Glycine max RepID=I1MS71_SOYBN	UniRef100_UPI000193CFF3 chromatin remodeling complex subunit, partial n=1 Tax=Populus trichocarpa RepID=UPI000193CFF3	AT5G22750.1|Symbols:RAD5|DNA/RNA helicase protein|chr5:7565374-7570871 REVERSE LENGTH=1029	DNA-dependent DNA replication; DNA mediated transformation; double-strand break repair via homologous recombination; double-strand break repair via synthesis-dependent strand annealing	ATP binding; DNA binding; helicase activity; hydrolase activity, acting on acid anhydrides, in phosphorus-containing anhydrides; nucleic acid binding; zinc ion binding	HIRAN domain; Helicase conserved C-terminal domain; Zinc finger, C3HC4 type (RING finger); SNF2 family N-terminal domain
Glyma.13G320100	Gm13	41452224	41460183	UniRef100_K7MK01 Uncharacterized protein n=1 Tax=Glycine max RepID=K7MK01_SOYBN	UniRef100_D7M1I2 PHD finger family protein n=1 Tax=Arabidopsis lyrata subsp. lyrata RepID=D7M1I2_ARALL	AT5G22760.1|Symbols:|PHD finger family protein|chr5:7571635-7577662 FORWARD LENGTH=1566	gravitropism; regulation of transcription, DNA-dependent	DNA binding; zinc ion binding	PHD-finger; DDT domain
Glyma.13G320200	Gm13	41460580	41472184	UniRef100_I1MS73 Uncharacterized protein n=2 Tax=Glycine max RepID=I1MS73_SOYBN	UniRef100_B9MYL1 Adaptin family protein n=1 Tax=Populus trichocarpa RepID=B9MYL1_POPTR	AT5G22780.1|Symbols:|Adaptor protein complex AP-2, alpha subunit|chr5:7590100-7597828 REVERSE LENGTH=1013	intracellular protein transport; protein transport; vesicle-mediated transport	protein binding; protein transporter activity	Alpha adaptin AP2, C-terminal domain; Adaptin C-terminal domain; Adaptin N terminal region
Glyma.13G320300	Gm13	41475746	41479710	UniRef100_I1MS74 Uncharacterized protein n=1 Tax=Glycine max RepID=I1MS74_SOYBN	UniRef100_Q7XKF5 OSJNBb0065J09.14 protein n=1 Tax=Oryza sativa subsp. japonica RepID=Q7XKF5_ORYSJ	AT5G22790.1|Symbols:RER1|reticulata-related 1|chr5:7599395-7601573 REVERSE LENGTH=433	biological process	molecular function	Domain of unknown function (DUF3411)
Glyma.13G320400	Gm13	41480941	41485224	UniRef100_I1MS75 Uncharacterized protein n=1 Tax=Glycine max RepID=I1MS75_SOYBN	UniRef100_A2Q365 BTB/POZ domain-containing protein n=1 Tax=Medicago truncatula RepID=A2Q365_MEDTR	AT3G44820.1|Symbols:|Phototropic-responsive NPH3 family protein|chr3:16361864-16364411 REVERSE LENGTH=651	response to light stimulus	signal transducer activity	NPH3 family
Glyma.13G320500	Gm13	41489968	41492504	UniRef100_UPI0003DE9669 PREDICTED: UDP-D-apiose/UDP-D-xylose synthase 2-like, partial n=1 Tax=Glycine max RepID=UPI0003DE9669	UniRef100_G4XGW6 UDP-D-apiose/UPD-D-xylose synthetase n=1 Tax=Vitis vinifera RepID=G4XGW6_VITVI	AT1G08200.1|Symbols:AXS2|UDP-D-apiose/UDP-D-xylose synthase 2|chr1:2574259-2576609 REVERSE LENGTH=389	cellular metabolic process; nucleotide-sugar biosynthetic process	UDP-glucuronate decarboxylase activity; catalytic activity; coenzyme binding; nucleotide binding	NAD dependent epimerase/dehydratase family
Glyma.13G320600	Gm13	41494194	41497018	UniRef100_I1MS77 Uncharacterized protein n=1 Tax=Glycine max RepID=I1MS77_SOYBN	UniRef100_B9HQK0 GDSL-motif lipase family protein n=1 Tax=Populus trichocarpa RepID=B9HQK0_POPTR	AT5G22810.1|Symbols:|GDSL-like Lipase/Acylhydrolase superfamily protein|chr5:7621568-7623367 FORWARD LENGTH=337	lipid metabolic process	carboxylesterase activity; hydrolase activity, acting on ester bonds; lipase activity	GDSL-like Lipase/Acylhydrolase
Glyma.13G320700	Gm13	41497778	41503033	UniRef100_I1MS78 Uncharacterized protein n=2 Tax=Glycine max RepID=I1MS78_SOYBN	UniRef100_C0Z225 ARM repeat superfamily protein n=1 Tax=Arabidopsis thaliana RepID=C0Z225_ARATH	AT5G22820.2|Symbols:|ARM repeat superfamily protein|chr5:7623886-7626943 REVERSE LENGTH=534	biological process; fatty acid beta-oxidation; protein import into peroxisome matrix	NA	NA
Glyma.13G320800	Gm13	41504465	41510677	UniRef100_K7MK03 Uncharacterized protein n=1 Tax=Glycine max RepID=K7MK03_SOYBN	UniRef100_Q058N4 Magnesium transporter MRS2-11, chloroplastic n=1 Tax=Arabidopsis thaliana RepID=MRS2B_ARATH	AT5G22830.1|Symbols:ATMGT10, GMN10, MGT10, MRS2-11|magnesium (Mg) transporter 10|chr5:7627676-7630633 FORWARD LENGTH=459	cellular cation homeostasis; divalent metal ion transport; magnesium ion transport; metal ion transport; transmembrane transport	magnesium ion transmembrane transporter activity; metal ion transmembrane transporter activity	CorA-like Mg2+ transporter protein
Glyma.13G320900	Gm13	41513388	41517053	UniRef100_I1MS80 Uncharacterized protein n=1 Tax=Glycine max RepID=I1MS80_SOYBN	UniRef100_B9MYL8 Kinase family protein n=1 Tax=Populus trichocarpa RepID=B9MYL8_POPTR	AT3G44850.1|Symbols:|Protein kinase superfamily protein|chr3:16374617-16376931 REVERSE LENGTH=534	nucleotide biosynthetic process; protein phosphorylation	ATP binding; kinase activity; protein kinase activity; protein serine/threonine kinase activity; transferase activity, transferring phosphorus-containing groups	Protein kinase domain
Glyma.13G321000	Gm13	41524700	41529653	UniRef100_I1MS81 Uncharacterized protein n=1 Tax=Glycine max RepID=I1MS81_SOYBN	UniRef100_Q0WRU5 Aspartyl protease family protein n=1 Tax=Arabidopsis thaliana RepID=Q0WRU5_ARATH	AT5G22850.1|Symbols:|Eukaryotic aspartyl protease family protein|chr5:7633717-7636298 REVERSE LENGTH=493	proteolysis	aspartic-type endopeptidase activity	Eukaryotic aspartyl protease
Glyma.13G321100	Gm13	41540417	41543961	UniRef100_I1MS82 Uncharacterized protein n=1 Tax=Glycine max RepID=I1MS82_SOYBN	UniRef100_G7L105 (E E)-alpha-farnesene synthase n=1 Tax=Medicago truncatula RepID=G7L105_MEDTR	AT4G16740.1|Symbols:ATTPS03, TPS03|terpene synthase 03|chr4:9407856-9410877 FORWARD LENGTH=565	metabolic process; purine nucleobase transport; response to herbivore; response to insect; response to jasmonic acid stimulus; response to wounding; sesquiterpenoid biosynthetic process	(E)-beta-ocimene synthase activity; alpha-farnesene synthase activity; lyase activity; magnesium ion binding; myrcene synthase activity; terpene synthase activity	Terpene synthase family, metal binding domain; Terpene synthase, N-terminal domain
Glyma.13G321200	Gm13	41546470	41550353	UniRef100_I1M4G0 Uncharacterized protein n=1 Tax=Glycine max RepID=I1M4G0_SOYBN	UniRef100_Q67Y83 Serine carboxypeptidase-like 51 n=1 Tax=Arabidopsis thaliana RepID=SCP51_ARATH	AT2G27920.1|Symbols:SCPL51|serine carboxypeptidase-like 51|chr2:11885777-11889043 REVERSE LENGTH=461	proteolysis; response to endoplasmic reticulum stress; systemic acquired resistance	serine-type carboxypeptidase activity	Serine carboxypeptidase
Glyma.13G321300	Gm13	41562361	41573783	UniRef100_K7M333 Uncharacterized protein n=2 Tax=Glycine max RepID=K7M333_SOYBN	UniRef100_F4IHN6 RING/U-box domain-containing protein n=2 Tax=Arabidopsis thaliana RepID=F4IHN6_ARATH	AT2G27950.1|Symbols:|Ring/U-Box superfamily protein|chr2:11899422-11903171 REVERSE LENGTH=839	biological process	zinc ion binding	NA
Glyma.13G321400	Gm13	41583359	41590443	UniRef100_I1M4F6 Uncharacterized protein n=1 Tax=Glycine max RepID=I1M4F6_SOYBN	UniRef100_F4IHN9 Acyl-CoA N-acyltransferase with RING/FYVE/PHD-type zinc finger domain-containing protein n=2 Tax=Arabidopsis thaliana RepID=F4IHN9_ARATH	AT2G27980.1|Symbols:|Acyl-CoA N-acyltransferase with RING/FYVE/PHD-type zinc finger domain|chr2:11913950-11919741 REVERSE LENGTH=1072	RNA interference; biological process; methylation-dependent chromatin silencing	zinc ion binding	PHD-finger
Glyma.13G321500	Gm13	41593848	41597456	UniRef100_I1M4F8 Uncharacterized protein n=2 Tax=Glycine max RepID=I1M4F8_SOYBN	UniRef100_B9HYD6 Phenazine biosynthesis PhzC/PhzF family protein n=1 Tax=Populus trichocarpa RepID=B9HYD6_POPTR	AT4G02860.1|Symbols:|Phenazine biosynthesis PhzC/PhzF protein|chr4:1268952-1270508 REVERSE LENGTH=313	biosynthetic process	catalytic activity	Phenazine biosynthesis-like protein
Glyma.13G321600	Gm13	41597488	41598228	UniRef100_K7M340 Histone H2B (Fragment) n=2 Tax=Glycine max RepID=K7M340_SOYBN	UniRef100_K7M340 Histone H2B (Fragment) n=2 Tax=Glycine max RepID=K7M340_SOYBN	AT2G28720.1|Symbols:|Histone superfamily protein|chr2:12327043-12327498 FORWARD LENGTH=151	nucleosome assembly	DNA binding	Core histone H2A/H2B/H3/H4
Glyma.13G321700	Gm13	41602238	41606724	UniRef100_I1M4G0 Uncharacterized protein n=1 Tax=Glycine max RepID=I1M4G0_SOYBN	UniRef100_Q67Y83 Serine carboxypeptidase-like 51 n=1 Tax=Arabidopsis thaliana RepID=SCP51_ARATH	AT2G27920.1|Symbols:SCPL51|serine carboxypeptidase-like 51|chr2:11885777-11889043 REVERSE LENGTH=461	proteolysis; response to endoplasmic reticulum stress; systemic acquired resistance	serine-type carboxypeptidase activity	Serine carboxypeptidase
Glyma.13G321800	Gm13	41610074	41611916	UniRef100_K7M342 Uncharacterized protein n=1 Tax=Glycine max RepID=K7M342_SOYBN	UniRef100_D7M1K6 Zinc finger family protein n=1 Tax=Arabidopsis lyrata subsp. lyrata RepID=D7M1K6_ARALL	AT5G22890.1|Symbols:|C2H2 and C2HC zinc fingers superfamily protein|chr5:7653541-7654662 REVERSE LENGTH=373	cellular response to iron ion starvation; iron ion transport; nitrate transport; regulation of transcription, DNA-dependent; response to chitin; response to nitrate	sequence-specific DNA binding transcription factor activity; zinc ion binding	NA
Glyma.13G321900	Gm13	41618514	41620114	UniRef100_I1M4G2 Uncharacterized protein n=1 Tax=Glycine max RepID=I1M4G2_SOYBN	UniRef100_G7JN94 ZPT2-11 n=1 Tax=Medicago truncatula RepID=G7JN94_MEDTR	AT2G28200.1|Symbols:|C2H2-type zinc finger family protein|chr2:12024321-12025181 FORWARD LENGTH=286	hydrogen peroxide biosynthetic process; photoperiodism, flowering; protein desumoylation; regulation of transcription, DNA-dependent; vegetative to reproductive phase transition of meristem	nucleic acid binding; sequence-specific DNA binding transcription factor activity; zinc ion binding	NA
Glyma.13G322000	Gm13	41635388	41642437	UniRef100_K7M344 Uncharacterized protein n=1 Tax=Glycine max RepID=K7M344_SOYBN	UniRef100_T2M9T3 Protein SMG8 (Fragment) n=2 Tax=Hydra vulgaris RepID=T2M9T3_HYDVU	NA	NA	NA	Uncharacterized conserved protein (DUF2146)
Glyma.13G322100	Gm13	41642943	41644610	UniRef100_I1M4G4 Uncharacterized protein n=1 Tax=Glycine max RepID=I1M4G4_SOYBN	UniRef100_G7JN98 BHLH transcription factor n=1 Tax=Medicago truncatula RepID=G7JN98_MEDTR	AT2G28160.1|Symbols:FIT1, ATBHLH029, FRU, BHLH029, ATBHLH29, ATFIT1|FER-like regulator of iron uptake|chr2:12004713-12005908 FORWARD LENGTH=318	cellular response to ethylene stimulus; cellular response to iron ion; cellular response to nitric oxide; regulation of iron ion transport; regulation of transcription, DNA-dependent; response to cytokinin stimulus; response to iron ion; transition metal ion transport	DNA binding; protein binding; sequence-specific DNA binding transcription factor activity	Helix-loop-helix DNA-binding domain
Glyma.13G322200	Gm13	41652734	41658042	UniRef100_I1M4G6 Uncharacterized protein n=2 Tax=Glycine max RepID=I1M4G6_SOYBN	UniRef100_G7JNA3 Auxin-regulated protein n=1 Tax=Medicago truncatula RepID=G7JNA3_MEDTR	AT2G28150.1|Symbols:|Domain of unknown function (DUF966)|chr2:12000015-12002227 FORWARD LENGTH=540	biological process	molecular function	Domain of unknown function (DUF966)
Glyma.13G322300	Gm13	41666833	41668784	UniRef100_I1M4G8 Uncharacterized protein n=1 Tax=Glycine max RepID=I1M4G8_SOYBN	UniRef100_Q9FFB5 Emb|CAB89309.1 n=1 Tax=Arabidopsis thaliana RepID=Q9FFB5_ARATH	AT5G22930.1|Symbols:|Protein of unknown function (DUF1635)|chr5:7668229-7669315 REVERSE LENGTH=238	biological process	molecular function	Protein of unknown function (DUF1635)
Glyma.13G322400	Gm13	41687948	41690356	UniRef100_I1M4G9 Uncharacterized protein n=1 Tax=Glycine max RepID=I1M4G9_SOYBN	UniRef100_B9HQN3 Exostosin family protein n=2 Tax=Populus trichocarpa RepID=B9HQN3_POPTR	AT2G28110.1|Symbols:FRA8, IRX7|Exostosin family protein|chr2:11978024-11979641 REVERSE LENGTH=448	glucuronoxylan biosynthetic process; glucuronoxylan metabolic process; secondary cell wall biogenesis; xylan biosynthetic process	glucuronosyltransferase activity; transferase activity	Exostosin family
Glyma.13G322500	Gm13	41694373	41696579	UniRef100_I1M4H0 Uncharacterized protein n=2 Tax=Glycine max RepID=I1M4H0_SOYBN	UniRef100_C5G5Y5 Xyloglucan endotraglucosylase/hydrolase n=1 Tax=Phaseolus angularis RepID=C5G5Y5_PHAAN	AT2G36870.1|Symbols:XTH32|xyloglucan endotransglucosylase/hydrolase 32|chr2:15472869-15474630 REVERSE LENGTH=299	cell wall biogenesis; cell wall macromolecule catabolic process	hydrolase activity, acting on glycosyl bonds; hydrolase activity, hydrolyzing O-glycosyl compounds; xyloglucan:xyloglucosyl transferase activity	Glycosyl hydrolases family 16; Xyloglucan endo-transglycosylase (XET) C-terminus
Glyma.13G322600	Gm13	41709896	41713941	UniRef100_I1M4H1 Uncharacterized protein n=1 Tax=Glycine max RepID=I1M4H1_SOYBN	UniRef100_G7IU67 Serine carboxypeptidase n=1 Tax=Medicago truncatula RepID=G7IU67_MEDTR	AT3G45010.1|Symbols:scpl48|serine carboxypeptidase-like 48|chr3:16466328-16468845 FORWARD LENGTH=510	proteolysis	serine-type carboxypeptidase activity	Serine carboxypeptidase
Glyma.13G322700	Gm13	41713082	41714436	UniRef100_I1M4H2 Uncharacterized protein n=1 Tax=Glycine max RepID=I1M4H2_SOYBN	NA	AT2G28105.1|Symbols:|CONTAINS InterPro DOMAIN/s: Nucleic acid-binding, OB-fold-like (InterPro:IPR016027), Replication factor A, C-terminal (InterPro:IPR013955); Has 20 Blast hits to 20 proteins in 10 species: Archae - 0; Bacteria - 0; Metazoa - 2; Fungi - 0; Plants - 18; Viruses - 0; Other Eukaryotes - 0 (source: NCBI BLink).|chr2:11976764-11977713 FORWARD LENGTH=166	biological process	molecular function	Replication factor-A C terminal domain
Glyma.13G322800	Gm13	41714974	41718293	UniRef100_K7M352 Uncharacterized protein n=1 Tax=Glycine max RepID=K7M352_SOYBN	UniRef100_G7IU62 Alpha-L-fucosidase n=1 Tax=Medicago truncatula RepID=G7IU62_MEDTR	AT2G28100.1|Symbols:ATFUC1, FUC1|alpha-L-fucosidase 1|chr2:11974803-11976489 FORWARD LENGTH=506	carbohydrate metabolic process; glycoprotein catabolic process	alpha-L-fucosidase activity; catalytic activity; cation binding	Alpha-L-fucosidase
Glyma.13G322900	Gm13	41731858	41733768	UniRef100_I1M4H4 Uncharacterized protein n=1 Tax=Glycine max RepID=I1M4H4_SOYBN	UniRef100_Q2LME0 MYB24 n=1 Tax=Malus domestica RepID=Q2LME0_MALDO	AT5G57620.1|Symbols:MYB36, AtMYB36|myb domain protein 36|chr5:23334904-23336388 FORWARD LENGTH=333	regulation of transcription, DNA-dependent	DNA binding; sequence-specific DNA binding transcription factor activity	Myb-like DNA-binding domain
Glyma.13G323000	Gm13	41740800	41746265	UniRef100_H2BER4 4-coumarate:CoA ligase n=2 Tax=Glycine max RepID=H2BER4_SOYBN	UniRef100_H2BER4 4-coumarate:CoA ligase n=2 Tax=Glycine max RepID=H2BER4_SOYBN	AT4G05160.1|Symbols:|AMP-dependent synthetase and ligase family protein|chr4:2664451-2666547 FORWARD LENGTH=544	jasmonic acid biosynthetic process; metabolic process	4-coumarate-CoA ligase activity; catalytic activity; fatty-acyl-CoA synthase activity	AMP-binding enzyme
Glyma.13G323100	Gm13	41758416	41764752	NA	NA	NA	NA	NA	NA
Glyma.13G323200	Gm13	41774766	41779037	UniRef100_I1M4H7 Uncharacterized protein n=1 Tax=Glycine max RepID=I1M4H7_SOYBN	UniRef100_B9N856 ABC transporter family protein n=1 Tax=Populus trichocarpa RepID=B9N856_POPTR	AT5G60790.1|Symbols:ATGCN1, GCN1|ABC transporter family protein|chr5:24453760-24455767 REVERSE LENGTH=595	glucose catabolic process; methylglyoxal catabolic process to D-lactate	ATP binding; ATPase activity; nucleoside-triphosphatase activity; nucleotide binding; transporter activity	ABC transporter
Glyma.13G323300	Gm13	41782633	41783296	UniRef100_I1M4H8 Uncharacterized protein n=1 Tax=Glycine max RepID=I1M4H8_SOYBN	UniRef100_G8A150 Auxin-induced protein-like protein n=1 Tax=Medicago truncatula RepID=G8A150_MEDTR	AT2G28085.1|Symbols:|SAUR-like auxin-responsive protein family|chr2:11968182-11968556 REVERSE LENGTH=124	response to auxin stimulus	molecular function	Auxin responsive protein
Glyma.13G323400	Gm13	41791841	41798858	UniRef100_K7M353 Uncharacterized protein n=1 Tax=Glycine max RepID=K7M353_SOYBN	UniRef100_G8A151 Dolichol kinase n=1 Tax=Medicago truncatula RepID=G8A151_MEDTR	AT3G45040.1|Symbols:|phosphatidate cytidylyltransferase family protein|chr3:16472801-16475702 REVERSE LENGTH=569	cellular membrane fusion; endoplasmic reticulum unfolded protein response; innate immune response; negative regulation of defense response; phospholipid biosynthetic process; response to chitin; salicylic acid biosynthetic process; salicylic acid mediated signaling pathway	dolichol kinase activity; phosphatidate cytidylyltransferase activity	NA
Glyma.13G323500	Gm13	41799767	41806286	UniRef100_I1M4I0 Uncharacterized protein n=1 Tax=Glycine max RepID=I1M4I0_SOYBN	UniRef100_G8A154 White-brown-complex ABC transporter family n=1 Tax=Medicago truncatula RepID=G8A154_MEDTR	AT2G28070.1|Symbols:|ABC-2 type transporter family protein|chr2:11956432-11959782 FORWARD LENGTH=730	NA	ATP binding; ATPase activity; ATPase activity, coupled to transmembrane movement of substances; nucleoside-triphosphatase activity; nucleotide binding	ABC-2 type transporter; ABC transporter
Glyma.13G323600	Gm13	41809774	41815441	UniRef100_P54774 Cell division cycle protein 48 homolog n=2 Tax=Glycine max RepID=CDC48_SOYBN	UniRef100_P54774 Cell division cycle protein 48 homolog n=2 Tax=Glycine max RepID=CDC48_SOYBN	AT5G03340.1|Symbols:|ATPase, AAA-type, CDC48 protein|chr5:810091-813133 REVERSE LENGTH=810	NA	ATP binding; ATPase activity; hydrolase activity; nucleoside-triphosphatase activity; nucleotide binding; protein binding	Cell division protein 48 (CDC48), N-terminal domain; Cell division protein 48 (CDC48), domain 2; ATPase family associated with various cellular activities (AAA)
Glyma.13G323700	Gm13	41816353	41817505	UniRef100_I1M4I1 Uncharacterized protein n=1 Tax=Glycine max RepID=I1M4I1_SOYBN	NA	NA	NA	NA	NA

## Sheet: soybase_go_enrichment
		Novel QTL for Low Seed Cadmium Accumulation in Soybean
	Nour Nissan1,2, Julia Hooker1,2, Arezo Pattang1,2, Martin Charette1, Malcolm Morrison1, Kangfu Yu3, Anfu Hou4, Ashkan Golshani2, Stephen J. Molnar1, Elroy R. Cober1, Bahram Samanfar1,2*
	1 Agriculture and Agri-Food Canada, Ottawa Research and Development Centre, Ottawa, ON, Canada.
	2Department of Biology and Ottawa Institute of Systems Biology, Carleton University, Ottawa, ON, Canada.
	3 Agriculture and Agri-Food Canada, Harrow Research and Development Centre, Harrow, ON, Canada.
	4 Agriculture and Agri-Food Canada, Morden Research and Development Centre, Morden, MB, Canada.
	*Corresponding author, bahram.samanfar@agr.gc.ca
Supplementary Table 2. Soybase GO Enrichment Data for genes within Satt218 SSR marker. Highlighted ontologies are of interest. Note: Instances where the corrected p-value is greater than 1 can occur because of the application of the Bonferroni correction; multiplication of the Fisher test p-value by the total number of GO terms in a particular list of genes of interest. For more information see M…
GO_id	Genome_GO_count	Expressed_GO	Expected_expression	Status	Corrected_P	GO_desc
GO:0015812	24	3	0.125574	Overrepresented	0.0916459	gamma-aminobutyric acid transport
GO:0009094	17	2	0.0889485	Overrepresented	1.22258	L-phenylalanine biosynthetic process
GO:0090437	1	1	0.00523226	Overrepresented	1.82178	socket cell differentiation
GO:0009913	27	2	0.141271	Overrepresented	3.04877	epidermal cell differentiation
GO:0006468	2386	4	12.4842	Underrepresented	3.26102	protein phosphorylation
GO:0001682	2	1	0.0104645	Overrepresented	3.63408	tRNA 5'-leader removal
GO:0031060	2	1	0.0104645	Overrepresented	3.63408	regulation of histone methylation
GO:0043144	2	1	0.0104645	Overrepresented	3.63408	snoRNA processing
GO:0055114	2341	4	12.2487	Underrepresented	4.44883	oxidation-reduction process
GO:0048440	176	4	0.920879	Overrepresented	4.87038	carpel development
GO:0015693	3	1	0.0156968	Overrepresented	5.43697	magnesium ion transport
GO:0034756	4	1	0.0209291	Overrepresented	7.23049	regulation of iron ion transport
GO:0071260	4	1	0.0209291	Overrepresented	7.23049	cellular response to mechanical stimulus
GO:0071311	4	1	0.0209291	Overrepresented	7.23049	cellular response to acetate
GO:0000041	201	4	1.05169	Overrepresented	7.52742	transition metal ion transport
GO:0051865	44	2	0.23022	Overrepresented	7.75338	protein autoubiquitination
GO:0043693	5	1	0.0261613	Overrepresented	9.01469	monoterpene biosynthetic process
GO:0009446	6	1	0.0313936	Overrepresented	10.7896	putrescine biosynthetic process
GO:0010479	6	1	0.0313936	Overrepresented	10.7896	stele development
GO:0006874	56	2	0.293007	Overrepresented	12.1181	cellular calcium ion homeostasis
GO:0009743	57	2	0.298239	Overrepresented	12.5164	response to carbohydrate stimulus
GO:0033365	7	1	0.0366259	Overrepresented	12.5553	protein localization to organelle
GO:0045003	7	1	0.0366259	Overrepresented	12.5553	double-strand break repair via synthesis-dependent strand annealing
GO:0010025	59	2	0.308704	Overrepresented	13.3278	wax biosynthetic process
GO:0007032	8	1	0.0418581	Overrepresented	14.3118	endosome organization
GO:0010039	62	2	0.3244	Overrepresented	14.5814	response to iron ion
GO:0071230	9	1	0.0470904	Overrepresented	16.0592	cellular response to amino acid stimulus
GO:0009226	10	1	0.0523226	Overrepresented	17.7976	nucleotide-sugar biosynthetic process
GO:0000289	11	1	0.0575549	Overrepresented	19.5268	nuclear-transcribed mRNA poly(A) tail shortening
GO:0006516	11	1	0.0575549	Overrepresented	19.5268	glycoprotein catabolic process
GO:0080169	11	1	0.0575549	Overrepresented	19.5268	cellular response to boron-containing substance deprivation
GO:0009451	75	2	0.39242	Overrepresented	20.4821	RNA modification
GO:0006101	12	1	0.0627872	Overrepresented	21.2471	citrate metabolic process
GO:0010201	12	1	0.0627872	Overrepresented	21.2471	response to continuous far red light stimulus by the high-irradiance response system
GO:0016106	13	1	0.0680194	Overrepresented	22.9585	sesquiterpenoid biosynthetic process
GO:0000303	81	2	0.423813	Overrepresented	23.4383	response to superoxide
GO:0002679	420	5	2.19755	Overrepresented	24.5596	respiratory burst involved in defense response
GO:0048497	14	1	0.0732517	Overrepresented	24.6609	maintenance of floral organ identity
GO:0009651	1845	4	9.65353	Underrepresented	24.8882	response to salt stress
GO:0006596	15	1	0.078484	Overrepresented	26.3546	polyamine biosynthetic process
GO:0007043	15	1	0.078484	Overrepresented	26.3546	cell-cell junction assembly
GO:0046686	1310	2	6.85427	Underrepresented	27.0234	response to cadmium ion
GO:0016120	16	1	0.0837162	Overrepresented	28.0394	carotene biosynthetic process
GO:0009873	311	4	1.62723	Overrepresented	28.236	ethylene mediated signaling pathway
GO:0000266	17	1	0.0889485	Overrepresented	29.7154	mitochondrial fission
GO:0009821	17	1	0.0889485	Overrepresented	29.7154	alkaloid biosynthetic process
GO:0010338	18	1	0.0941808	Overrepresented	31.3827	leaf formation
GO:0010358	19	1	0.099413	Overrepresented	33.0414	leaf shaping
GO:0080036	20	1	0.104645	Overrepresented	34.6915	regulation of cytokinin mediated signaling pathway
GO:0031087	21	1	0.109878	Overrepresented	36.3329	deadenylation-independent decapping of nuclear-transcribed mRNA
GO:0000272	106	2	0.55462	Overrepresented	37.0456	polysaccharide catabolic process
GO:0035556	479	5	2.50625	Overrepresented	37.4531	intracellular signal transduction
GO:0045814	22	1	0.11511	Overrepresented	37.9659	negative regulation of gene expression, epigenetic
GO:0006102	24	1	0.125574	Overrepresented	41.2064	isocitrate metabolic process
GO:0010158	24	1	0.125574	Overrepresented	41.2064	abaxial cell fate specification
GO:0010228	754	7	3.94513	Overrepresented	42.3857	vegetative to reproductive phase transition of meristem
GO:0010106	237	3	1.24005	Overrepresented	44.5456	cellular response to iron ion starvation
GO:0009556	121	2	0.633104	Overrepresented	45.9991	microsporogenesis
GO:0043068	27	1	0.141271	Overrepresented	46.0042	positive regulation of programmed cell death
GO:0071369	27	1	0.141271	Overrepresented	46.0042	cellular response to ethylene stimulus
GO:0006826	241	3	1.26098	Overrepresented	46.173	iron ion transport
GO:0006952	1116	2	5.83921	Underrepresented	48.8729	defense response
GO:0009409	1117	2	5.84444	Underrepresented	48.8942	response to cold
GO:0070417	29	1	0.151736	Overrepresented	49.1613	cellular response to cold
GO:0015698	31	1	0.1622	Overrepresented	52.2857	inorganic anion transport
GO:0016558	258	3	1.34992	Overrepresented	53.3101	protein import into peroxisome matrix
GO:0010078	32	1	0.167432	Overrepresented	53.8357	maintenance of root meristem identity
GO:0009957	33	1	0.172665	Overrepresented	55.3776	epidermal cell fate specification
GO:0055046	33	1	0.172665	Overrepresented	55.3776	microgametogenesis
GO:0080027	33	1	0.172665	Overrepresented	55.3776	response to herbivore
GO:0002237	263	3	1.37609	Overrepresented	55.4724	response to molecule of bacterial origin
GO:0006914	138	2	0.722053	Overrepresented	56.6568	autophagy
GO:0010417	35	1	0.183129	Overrepresented	58.4376	glucuronoxylan biosynthetic process
GO:0019722	141	2	0.737749	Overrepresented	58.5817	calcium-mediated signaling
GO:0007155	272	3	1.42318	Overrepresented	59.4303	cell adhesion
GO:0071732	36	1	0.188362	Overrepresented	59.9556	cellular response to nitric oxide
GO:0007165	1328	3	6.94845	Underrepresented	61.4003	signal transduction
GO:0008654	39	1	0.204058	Overrepresented	64.4625	phospholipid biosynthetic process
GO:0030244	285	3	1.4912	Overrepresented	65.2835	cellulose biosynthetic process
GO:0009611	1031	2	5.39446	Underrepresented	66.0286	response to wounding
GO:0006499	1045	2	5.46772	Underrepresented	66.4213	N-terminal protein myristoylation
GO:0055085	1061	2	5.55143	Underrepresented	67.0525	transmembrane transport
GO:0045037	41	1	0.214523	Overrepresented	67.4283	protein import into chloroplast stroma
GO:0009723	726	1	3.79862	Underrepresented	68.4688	response to ethylene stimulus
GO:0009753	756	1	3.95559	Underrepresented	69.2955	response to jasmonic acid stimulus
GO:0033043	44	1	0.23022	Overrepresented	71.8193	regulation of organelle organization
GO:0080156	44	1	0.23022	Overrepresented	71.8193	mitochondrial mRNA modification
GO:0016925	45	1	0.235452	Overrepresented	73.2677	protein sumoylation
GO:0003002	46	1	0.240684	Overrepresented	74.7087	regionalization
GO:0044265	46	1	0.240684	Overrepresented	74.7087	cellular macromolecule catabolic process
GO:0007186	49	1	0.256381	Overrepresented	78.9867	G-protein coupled receptor signaling pathway
GO:0000003	50	1	0.261613	Overrepresented	80.3979	reproduction
GO:0009631	50	1	0.261613	Overrepresented	80.3979	cold acclimation
GO:0010054	51	1	0.266845	Overrepresented	81.8018	trichoblast differentiation
GO:0010082	51	1	0.266845	Overrepresented	81.8018	regulation of root meristem growth
GO:0010197	52	1	0.272078	Overrepresented	83.1984	polar nucleus fusion
GO:0016114	52	1	0.272078	Overrepresented	83.1984	terpenoid biosynthetic process
GO:0051603	52	1	0.272078	Overrepresented	83.1984	proteolysis involved in cellular protein catabolic process
GO:0009561	53	1	0.27731	Overrepresented	84.5877	megagametogenesis
GO:0010074	54	1	0.282542	Overrepresented	85.9698	maintenance of meristem identity
GO:0031537	54	1	0.282542	Overrepresented	85.9698	regulation of anthocyanin metabolic process
GO:0016567	597	5	3.12366	Overrepresented	86.2177	protein ubiquitination
GO:0048831	55	1	0.287775	Overrepresented	87.3447	regulation of shoot system development
GO:0050832	941	2	4.92356	Underrepresented	88.6887	defense response to fungus
GO:0009853	337	3	1.76327	Overrepresented	89.9034	photorespiration
GO:0001708	57	1	0.298239	Overrepresented	90.0731	cell fate specification
GO:0043622	59	1	0.308704	Overrepresented	92.7732	cortical microtubule organization
GO:0006325	60	1	0.313936	Overrepresented	94.1128	chromatin organization
GO:0009408	659	1	3.44806	Underrepresented	95.9844	response to heat
GO:0006096	661	1	3.45853	Underrepresented	96.0501	glycolysis
GO:0010073	198	2	1.03599	Overrepresented	96.4381	meristem maintenance
GO:0006807	62	1	0.3244	Overrepresented	96.771	nitrogen compound metabolic process
GO:0007031	62	1	0.3244	Overrepresented	96.771	peroxisome organization
GO:0000079	63	1	0.329633	Overrepresented	98.0897	regulation of cyclin-dependent protein serine/threonine kinase activity
GO:0016197	63	1	0.329633	Overrepresented	98.0897	endosomal transport
GO:0006073	67	1	0.350562	Overrepresented	103.297	cellular glucan metabolic process
GO:0009789	67	1	0.350562	Overrepresented	103.297	positive regulation of abscisic acid mediated signaling pathway
GO:0010091	67	1	0.350562	Overrepresented	103.297	trichome branching
GO:0016569	69	1	0.361026	Overrepresented	105.859	covalent chromatin modification
GO:0009793	1180	3	6.17407	Underrepresented	106.15	embryo development ending in seed dormancy
GO:0009294	70	1	0.366259	Overrepresented	107.131	DNA mediated transformation
GO:0010305	70	1	0.366259	Overrepresented	107.131	leaf vascular tissue pattern formation
GO:0055072	72	1	0.376723	Overrepresented	109.654	iron ion homeostasis
GO:0050826	221	2	1.15633	Overrepresented	111.84	response to freezing
GO:0008356	74	1	0.387188	Overrepresented	112.151	asymmetric cell division
GO:0019915	222	2	1.16156	Overrepresented	112.505	lipid storage
GO:0006397	76	1	0.397652	Overrepresented	114.622	mRNA processing
GO:0016998	78	1	0.408117	Overrepresented	117.068	cell wall macromolecule catabolic process
GO:0071281	78	1	0.408117	Overrepresented	117.068	cellular response to iron ion
GO:0006810	883	2	4.62009	Underrepresented	119.565	transport
GO:0009933	233	2	1.21912	Overrepresented	119.792	meristem structural organization
GO:0006414	81	1	0.423813	Overrepresented	120.688	translational elongation
GO:0009960	81	1	0.423813	Overrepresented	120.688	endosperm development
GO:0007275	236	2	1.23481	Overrepresented	121.767	multicellular organismal development
GO:0009625	83	1	0.434278	Overrepresented	123.071	response to insect
GO:0010388	238	2	1.24528	Overrepresented	123.081	cullin deneddylation
GO:0010048	240	2	1.25574	Overrepresented	124.392	vernalization response
GO:0007017	86	1	0.449975	Overrepresented	126.599	microtubule-based process
GO:0048513	86	1	0.449975	Overrepresented	126.599	organ development
GO:0019288	581	1	3.03995	Underrepresented	133.722	isopentenyl diphosphate biosynthetic process, mevalonate-independent pathway
GO:0009644	582	1	3.04518	Underrepresented	133.764	response to high light intensity
GO:0031047	256	2	1.33946	Overrepresented	134.777	gene silencing by RNA
GO:0042742	1063	3	5.5619	Underrepresented	136.266	defense response to bacterium
GO:0016117	259	2	1.35516	Overrepresented	136.701	carotenoid biosynthetic process
GO:0000302	97	1	0.50753	Overrepresented	139.071	response to reactive oxygen species
GO:0048443	263	2	1.37609	Overrepresented	139.255	stamen development
GO:0009269	98	1	0.512762	Overrepresented	140.17	response to desiccation
GO:0010351	98	1	0.512762	Overrepresented	140.17	lithium ion transport
GO:0051225	98	1	0.512762	Overrepresented	140.17	spindle assembly
GO:0009755	100	1	0.523226	Overrepresented	142.35	hormone-mediated signaling pathway
GO:0042752	101	1	0.528459	Overrepresented	143.432	regulation of circadian rhythm
GO:0009693	270	2	1.41271	Overrepresented	143.69	ethylene biosynthetic process
GO:0000160	103	1	0.538923	Overrepresented	145.579	phosphorelay signal transduction system
GO:0032204	105	1	0.549388	Overrepresented	147.703	regulation of telomere maintenance
GO:0043247	105	1	0.549388	Overrepresented	147.703	telomere maintenance in response to DNA damage
GO:0009686	106	1	0.55462	Overrepresented	148.757	gibberellin biosynthetic process
GO:0009910	106	1	0.55462	Overrepresented	148.757	negative regulation of flower development
GO:0006944	717	5	3.75153	Overrepresented	150.724	cellular membrane fusion
GO:0006312	110	1	0.575549	Overrepresented	152.918	mitotic recombination
GO:0010440	113	1	0.591246	Overrepresented	155.982	stomatal lineage progression
GO:0006412	763	2	3.99222	Underrepresented	157.545	translation
GO:0010090	387	3	2.02489	Overrepresented	160.827	trichome morphogenesis
GO:0051604	118	1	0.617407	Overrepresented	160.984	protein maturation
GO:0048765	396	3	2.07198	Overrepresented	163.152	root hair cell differentiation
GO:0000278	398	3	2.08244	Overrepresented	163.681	mitotic cell cycle
GO:0006733	121	1	0.633104	Overrepresented	163.923	oxidoreduction coenzyme metabolic process
GO:0006766	121	1	0.633104	Overrepresented	163.923	vitamin metabolic process
GO:0009106	121	1	0.633104	Overrepresented	163.923	lipoate metabolic process
GO:0009108	121	1	0.633104	Overrepresented	163.923	coenzyme biosynthetic process
GO:0009888	121	1	0.633104	Overrepresented	163.923	tissue development
GO:0044272	121	1	0.633104	Overrepresented	163.923	sulfur compound biosynthetic process
GO:0006863	122	1	0.638336	Overrepresented	164.892	purine nucleobase transport
GO:0010029	122	1	0.638336	Overrepresented	164.892	regulation of seed germination
GO:0016579	123	1	0.643569	Overrepresented	165.857	protein deubiquitination
GO:0010638	124	1	0.648801	Overrepresented	166.816	positive regulation of organelle organization
GO:0006886	410	3	2.14523	Overrepresented	166.947	intracellular protein transport
GO:0001510	418	3	2.18709	Overrepresented	169.202	RNA methylation
GO:0006334	128	1	0.66973	Overrepresented	170.604	nucleosome assembly
GO:0009072	128	1	0.66973	Overrepresented	170.604	aromatic amino acid family metabolic process
GO:0006310	130	1	0.680194	Overrepresented	172.469	DNA recombination
GO:0009416	440	3	2.3022	Overrepresented	175.677	response to light stimulus
GO:0009610	134	1	0.701123	Overrepresented	176.14	response to symbiotic fungus
GO:0009834	135	1	0.706356	Overrepresented	177.046	secondary cell wall biogenesis
GO:0019748	135	1	0.706356	Overrepresented	177.046	secondary metabolic process
GO:0006406	136	1	0.711588	Overrepresented	177.948	mRNA export from nucleus
GO:0000096	137	1	0.71682	Overrepresented	178.844	sulfur amino acid metabolic process
GO:0007033	137	1	0.71682	Overrepresented	178.844	vacuole organization
GO:0007126	137	1	0.71682	Overrepresented	178.844	meiosis
GO:0010043	137	1	0.71682	Overrepresented	178.844	response to zinc ion
GO:0006635	455	3	2.38068	Overrepresented	180.276	fatty acid beta-oxidation
GO:0048519	139	1	0.727285	Overrepresented	180.623	negative regulation of biological process
GO:0045892	468	3	2.4487	Overrepresented	184.355	negative regulation of transcription, DNA-dependent
GO:0000911	471	1	2.4644	Underrepresented	184.652	cytokinesis by cell plate formation
GO:0009965	489	1	2.55858	Underrepresented	184.937	leaf morphogenesis
GO:0048451	144	1	0.753446	Overrepresented	184.991	petal formation
GO:0048453	144	1	0.753446	Overrepresented	184.991	sepal formation
GO:0048767	504	1	2.63706	Underrepresented	185.556	root hair elongation
GO:0042542	511	1	2.67369	Underrepresented	185.956	response to hydrogen peroxide
GO:0006364	532	1	2.78356	Underrepresented	187.552	rRNA processing
GO:0009553	147	1	0.769143	Overrepresented	187.557	embryo sac development
GO:0006629	534	1	2.79403	Underrepresented	187.734	lipid metabolic process
GO:0010200	1135	7	5.93862	Overrepresented	187.753	response to chitin
GO:0007030	539	1	2.82019	Underrepresented	188.209	Golgi organization
GO:0044237	148	1	0.774375	Overrepresented	188.404	cellular metabolic process
GO:0009117	150	1	0.78484	Overrepresented	190.084	nucleotide metabolic process
GO:0000724	151	1	0.790072	Overrepresented	190.917	double-strand break repair via homologous recombination
GO:0009612	152	1	0.795304	Overrepresented	191.746	response to mechanical stimulus
GO:0016458	156	1	0.816233	Overrepresented	195.019	gene silencing
GO:0016571	156	1	0.816233	Overrepresented	195.019	histone methylation
GO:0006546	157	1	0.821466	Overrepresented	195.827	glycine catabolic process
GO:0006891	157	1	0.821466	Overrepresented	195.827	intra-Golgi vesicle-mediated transport
GO:0010332	157	1	0.821466	Overrepresented	195.827	response to gamma radiation
GO:0016572	159	1	0.83193	Overrepresented	197.43	histone phosphorylation
GO:0016570	163	1	0.852859	Overrepresented	200.586	histone modification
GO:0006979	632	4	3.30679	Overrepresented	201.638	response to oxidative stress
GO:0009735	167	1	0.873788	Overrepresented	203.677	response to cytokinin stimulus
GO:0042793	169	1	0.884253	Overrepresented	205.198	transcription from plastid promoter
GO:0009410	174	1	0.910414	Overrepresented	208.933	response to xenobiotic stimulus
GO:0048367	174	1	0.910414	Overrepresented	208.933	shoot system development
GO:0051510	175	1	0.915646	Overrepresented	209.668	regulation of unidimensional cell growth
GO:0010050	176	1	0.920879	Overrepresented	210.4	vegetative phase change
GO:0043248	183	1	0.957504	Overrepresented	215.415	proteasome assembly
GO:0010286	184	1	0.962737	Overrepresented	216.116	heat acclimation
GO:0042546	185	1	0.967969	Overrepresented	216.814	cell wall biogenesis
GO:0019243	186	1	0.973201	Overrepresented	217.508	methylglyoxal catabolic process to D-lactate
GO:0034660	187	1	0.978433	Overrepresented	218.199	ncRNA metabolic process
GO:0048449	190	1	0.99413	Overrepresented	220.25	floral organ formation
GO:0010182	272	2	1.42318	Overrepresented	229.457	sugar mediated signaling pathway
GO:0030003	274	2	1.43364	Overrepresented	229.832	cellular cation homeostasis
GO:0009560	289	2	1.51212	Overrepresented	232.804	embryo sac egg cell differentiation
GO:0009887	289	2	1.51212	Overrepresented	232.804	organ morphogenesis
GO:0045893	1080	4	5.65085	Underrepresented	234.463	positive regulation of transcription, DNA-dependent
GO:0006346	306	2	1.60107	Overrepresented	236.454	methylation-dependent chromatin silencing
GO:0043481	310	2	1.622	Overrepresented	237.348	anthocyanin accumulation in tissues in response to UV light
GO:0045010	312	2	1.63247	Overrepresented	237.799	actin nucleation
GO:0080129	319	2	1.66909	Overrepresented	239.401	proteasome core complex assembly
GO:0009855	326	2	1.70572	Overrepresented	241.033	determination of bilateral symmetry
GO:0006396	330	2	1.72665	Overrepresented	241.977	RNA processing
GO:0010014	342	2	1.78943	Overrepresented	244.853	meristem initiation
GO:0051726	345	2	1.80513	Overrepresented	245.58	regulation of cell cycle
GO:0006486	348	2	1.82083	Overrepresented	246.311	protein glycosylation
GO:0009058	348	2	1.82083	Overrepresented	246.311	biosynthetic process
GO:0080167	356	2	1.86269	Overrepresented	248.27	response to karrikin
GO:0008283	388	1	2.03012	Underrepresented	254.879	cell proliferation
GO:0048364	401	1	2.09814	Underrepresented	255.055	root development
GO:0009555	405	1	2.11907	Underrepresented	255.15	pollen development
GO:0048481	415	1	2.17139	Underrepresented	255.468	ovule development
GO:0006098	421	1	2.20278	Underrepresented	255.711	pentose-phosphate shunt
GO:0006306	421	1	2.20278	Underrepresented	255.711	DNA methylation
GO:0006865	444	1	2.32313	Underrepresented	256.982	amino acid transport
GO:0010075	450	1	2.35452	Underrepresented	257.395	regulation of meristem growth
GO:0006833	451	1	2.35975	Underrepresented	257.467	water transport
GO:0015979	452	1	2.36498	Underrepresented	257.54	photosynthesis
GO:0006094	463	1	2.42254	Underrepresented	258.395	gluconeogenesis
GO:0010167	479	3	2.50625	Overrepresented	259.809	response to nitrate
GO:0015706	486	3	2.54288	Overrepresented	260.484	nitrate transport
GO:0009640	502	3	2.6266	Overrepresented	262.145	photomorphogenesis
GO:0016192	549	3	2.87251	Overrepresented	267.789	vesicle-mediated transport
GO:0009697	653	2	3.41667	Underrepresented	273.135	salicylic acid biosynthetic process
GO:0006457	779	3	4.07593	Underrepresented	281.253	protein folding
GO:0009867	800	3	4.18581	Underrepresented	281.46	jasmonic acid mediated signaling pathway
GO:0005975	911	5	4.76659	Overrepresented	285.391	carbohydrate metabolic process
GO:0006355	4060	22	21.243	Overrepresented	288.401	regulation of transcription, DNA-dependent
GO:0010363	1019	4	5.33168	Underrepresented	288.745	regulation of plant-type hypersensitive response
GO:0006612	1020	4	5.33691	Underrepresented	288.763	protein targeting to membrane
GO:0009733	1020	4	5.33691	Underrepresented	288.763	response to auxin stimulus
GO:0009737	1254	7	6.56126	Overrepresented	294.623	response to abscisic acid stimulus
GO:0000165	575	3	3.00855	Underrepresented	350	MAPK cascade
GO:0000226	379	1	1.98303	Underrepresented	350	microtubule cytoskeleton organization
GO:0000271	274	1	1.43364	Underrepresented	350	polysaccharide biosynthetic process
GO:0006007	261	1	1.36562	Underrepresented	350	glucose catabolic process
GO:0006261	234	1	1.22435	Underrepresented	350	DNA-dependent DNA replication
GO:0006342	372	1	1.9464	Underrepresented	350	chromatin silencing
GO:0006487	298	1	1.55921	Underrepresented	350	protein N-linked glycosylation
GO:0006508	938	4	4.90786	Underrepresented	350	proteolysis
GO:0006511	619	3	3.23877	Underrepresented	350	ubiquitin-dependent protein catabolic process
GO:0006606	243	1	1.27144	Underrepresented	350	protein import into nucleus
GO:0006623	319	1	1.66909	Underrepresented	350	protein targeting to vacuole
GO:0006636	204	1	1.06738	Underrepresented	350	unsaturated fatty acid biosynthetic process
GO:0006816	324	1	1.69525	Underrepresented	350	calcium ion transport
GO:0006869	279	1	1.4598	Underrepresented	350	lipid transport
GO:0006972	305	1	1.59584	Underrepresented	350	hyperosmotic response
GO:0007131	263	1	1.37609	Underrepresented	350	reciprocal meiotic recombination
GO:0008652	193	1	1.00983	Underrepresented	350	cellular amino acid biosynthetic process
GO:0009165	201	1	1.05169	Underrepresented	350	nucleotide biosynthetic process
GO:0009266	362	1	1.89408	Underrepresented	350	response to temperature stimulus
GO:0009407	535	2	2.79926	Underrepresented	350	toxin catabolic process
GO:0009414	888	4	4.64625	Underrepresented	350	response to water deprivation
GO:0009616	267	1	1.39701	Underrepresented	350	virus induced gene silencing
GO:0009627	751	3	3.92943	Underrepresented	350	systemic acquired resistance
GO:0009630	358	1	1.87315	Underrepresented	350	gravitropism
GO:0009658	316	1	1.6534	Underrepresented	350	chloroplast organization
GO:0009695	417	2	2.18185	Underrepresented	350	jasmonic acid biosynthetic process
GO:0009736	197	1	1.03076	Underrepresented	350	cytokinin mediated signaling pathway
GO:0009738	634	3	3.31726	Underrepresented	350	abscisic acid mediated signaling pathway
GO:0009740	212	1	1.10924	Underrepresented	350	gibberellic acid mediated signaling pathway
GO:0009790	263	1	1.37609	Underrepresented	350	embryo development
GO:0009791	192	1	1.00459	Underrepresented	350	post-embryonic development
GO:0009814	196	1	1.02552	Underrepresented	350	defense response, incompatible interaction
GO:0009845	482	2	2.52195	Underrepresented	350	seed germination
GO:0009862	688	3	3.5998	Underrepresented	350	systemic acquired resistance, salicylic acid mediated signaling pathway
GO:0009863	458	2	2.39638	Underrepresented	350	salicylic acid mediated signaling pathway
GO:0009902	230	1	1.20342	Underrepresented	350	chloroplast relocation
GO:0009909	744	3	3.8928	Underrepresented	350	regulation of flower development
GO:0009963	300	1	1.56968	Underrepresented	350	positive regulation of flavonoid biosynthetic process
GO:0010027	469	2	2.45393	Underrepresented	350	thylakoid membrane organization
GO:0010051	193	1	1.00983	Underrepresented	350	xylem and phloem pattern formation
GO:0010103	362	1	1.89408	Underrepresented	350	stomatal complex morphogenesis
GO:0010162	406	2	2.1243	Underrepresented	350	seed dormancy process
GO:0010310	535	2	2.79926	Underrepresented	350	regulation of hydrogen peroxide metabolic process
GO:0010413	495	2	2.58997	Underrepresented	350	glucuronoxylan metabolic process
GO:0010583	454	2	2.37545	Underrepresented	350	response to cyclopentenone
GO:0015031	286	1	1.49643	Underrepresented	350	protein transport
GO:0015824	246	1	1.28714	Underrepresented	350	proline transport
GO:0015995	294	1	1.53829	Underrepresented	350	chlorophyll biosynthetic process
GO:0016036	330	1	1.72665	Underrepresented	350	cellular response to phosphate starvation
GO:0016049	360	1	1.88362	Underrepresented	350	cell growth
GO:0016132	271	1	1.41794	Underrepresented	350	brassinosteroid biosynthetic process
GO:0016226	227	1	1.18772	Underrepresented	350	iron-sulfur cluster assembly
GO:0016246	203	1	1.06215	Underrepresented	350	RNA interference
GO:0016926	219	1	1.14587	Underrepresented	350	protein desumoylation
GO:0019344	459	2	2.40161	Underrepresented	350	cysteine biosynthetic process
GO:0019761	349	1	1.82606	Underrepresented	350	glucosinolate biosynthetic process
GO:0030001	247	1	1.29237	Underrepresented	350	metal ion transport
GO:0030968	501	2	2.62136	Underrepresented	350	endoplasmic reticulum unfolded protein response
GO:0031048	261	1	1.36562	Underrepresented	350	chromatin silencing by small RNA
GO:0031348	766	3	4.00791	Underrepresented	350	negative regulation of defense response
GO:0033044	208	1	1.08831	Underrepresented	350	regulation of chromosome organization
GO:0034968	258	1	1.34992	Underrepresented	350	histone lysine methylation
GO:0034976	483	2	2.52718	Underrepresented	350	response to endoplasmic reticulum stress
GO:0042023	257	1	1.34469	Underrepresented	350	DNA endoreduplication
GO:0042254	264	1	1.38132	Underrepresented	350	ribosome biogenesis
GO:0042538	461	2	2.41207	Underrepresented	350	hyperosmotic salinity response
GO:0042545	266	1	1.39178	Underrepresented	350	cell wall modification
GO:0043069	525	2	2.74694	Underrepresented	350	negative regulation of programmed cell death
GO:0043090	266	1	1.39178	Underrepresented	350	amino acid import
GO:0043161	282	1	1.4755	Underrepresented	350	proteasomal ubiquitin-dependent protein catabolic process
GO:0043687	222	1	1.16156	Underrepresented	350	post-translational protein modification
GO:0045087	274	1	1.43364	Underrepresented	350	innate immune response
GO:0045492	497	2	2.60044	Underrepresented	350	xylan biosynthetic process
GO:0048439	191	1	0.999363	Overrepresented	350	flower morphogenesis
GO:0048573	342	1	1.78943	Underrepresented	350	photoperiodism, flowering
GO:0050665	206	1	1.07785	Underrepresented	350	hydrogen peroxide biosynthetic process
GO:0051301	211	1	1.10401	Underrepresented	350	cell division
GO:0051567	443	2	2.31789	Underrepresented	350	histone H3-K9 methylation
GO:0051788	426	2	2.22894	Underrepresented	350	response to misfolded protein
GO:0070838	237	1	1.24005	Underrepresented	350	divalent metal ion transport
GO:0071555	448	2	2.34405	Underrepresented	350	cell wall organization
GO:0010333	37	5	0.187785	Overrepresented	0.000155982	terpene synthase activity
GO:0015185	24	3	0.121806	Overrepresented	0.0305735	gamma-aminobutyric acid transmembrane transporter activity
GO:0016829	109	5	0.553204	Overrepresented	0.0310602	lyase activity
GO:0034768	8	2	0.0406021	Overrepresented	0.0893221	(E)-beta-ocimene synthase activity
GO:0050551	8	2	0.0406021	Overrepresented	0.0893221	myrcene synthase activity
GO:0004664	11	2	0.0558279	Overrepresented	0.173703	prephenate dehydratase activity
GO:0047769	11	2	0.0558279	Overrepresented	0.173703	arogenate dehydratase activity
GO:0080019	11	2	0.0558279	Overrepresented	0.173703	fatty-acyl-CoA reductase (alcohol-forming) activity
GO:0016161	19	2	0.0964301	Overrepresented	0.525836	beta-amylase activity
GO:0010334	1	1	0.00507527	Overrepresented	0.646363	sesquiterpene synthase activity
GO:0034002	1	1	0.00507527	Overrepresented	0.646363	(R)-limonene synthase activity
GO:0050550	1	1	0.00507527	Overrepresented	0.646363	pinene synthase activity
GO:0050552	1	1	0.00507527	Overrepresented	0.646363	(4S)-limonene synthase activity
GO:0080015	1	1	0.00507527	Overrepresented	0.646363	sabinene synthase activity
GO:0016491	1468	1	7.45049	Underrepresented	1.0693	oxidoreductase activity
GO:0016772	2469	4	12.5308	Underrepresented	1.12483	transferase activity, transferring phosphorus-containing groups
GO:0000287	249	5	1.26374	Overrepresented	1.15152	magnesium ion binding
GO:0004185	92	3	0.466925	Overrepresented	1.4738	serine-type carboxypeptidase activity
GO:0050126	3	1	0.0152258	Overrepresented	1.92934	N-carbamoylputrescine amidase activity
GO:0005217	41	2	0.208086	Overrepresented	2.3442	intracellular ligand-gated ion channel activity
GO:0016620	43	2	0.218236	Overrepresented	2.56451	oxidoreductase activity, acting on the aldehyde or oxo group of donors, NAD or NADP as acceptor
GO:0004168	4	1	0.0203011	Overrepresented	2.56599	dolichol kinase activity
GO:0015276	4	1	0.0203011	Overrepresented	2.56599	ligand-gated ion channel activity
GO:0045436	4	1	0.0203011	Overrepresented	2.56599	lycopene beta cyclase activity
GO:0016627	47	2	0.238538	Overrepresented	3.02985	oxidoreductase activity, acting on the CH-CH group of donors
GO:0052578	5	1	0.0253763	Overrepresented	3.19943	alpha-farnesene synthase activity
GO:0004672	2453	5	12.4496	Underrepresented	3.64267	protein kinase activity
GO:0016301	2134	4	10.8306	Underrepresented	3.74392	kinase activity
GO:0005524	4522	13	22.9504	Underrepresented	3.80261	ATP binding
GO:0004674	2183	4	11.0793	Underrepresented	3.81583	protein serine/threonine kinase activity
GO:0033613	7	1	0.0355269	Overrepresented	4.45676	activating transcription factor binding
GO:0042803	259	4	1.31449	Overrepresented	5.52236	protein homodimerization activity
GO:0004560	9	1	0.0456774	Overrepresented	5.70146	alpha-L-fucosidase activity
GO:0008066	9	1	0.0456774	Overrepresented	5.70146	glutamate receptor activity
GO:0032440	9	1	0.0456774	Overrepresented	5.70146	2-alkenal reductase [NAD(P)] activity
GO:0004321	10	1	0.0507527	Overrepresented	6.31911	fatty-acyl-CoA synthase activity
GO:0016762	76	2	0.38572	Overrepresented	7.26526	xyloglucan:xyloglucosyl transferase activity
GO:0003994	12	1	0.0609032	Overrepresented	7.5451	aconitate hydratase activity
GO:0004605	13	1	0.0659785	Overrepresented	8.15346	phosphatidate cytidylyltransferase activity
GO:0004965	13	1	0.0659785	Overrepresented	8.15346	G-protein coupled GABA receptor activity
GO:0030675	13	1	0.0659785	Overrepresented	8.15346	Rac GTPase activator activity
GO:0042800	14	1	0.0710537	Overrepresented	8.75877	histone methyltransferase activity (H3-K4 specific)
GO:0003723	1047	1	5.3138	Underrepresented	9.27372	RNA binding
GO:0005262	16	1	0.0812043	Overrepresented	9.96024	calcium channel activity
GO:0015095	18	1	0.0913548	Overrepresented	11.1496	magnesium ion transmembrane transporter activity
GO:0043169	335	4	1.70021	Overrepresented	11.6472	cation binding
GO:0016844	19	1	0.0964301	Overrepresented	11.7399	strictosidine synthase activity
GO:0048040	20	1	0.101505	Overrepresented	12.3271	UDP-glucuronate decarboxylase activity
GO:0051753	21	1	0.106581	Overrepresented	12.9114	mannan synthase activity
GO:0009055	970	1	4.92301	Underrepresented	13.1207	electron carrier activity
GO:0004526	22	1	0.111656	Overrepresented	13.4927	ribonuclease P activity
GO:0004033	24	1	0.121806	Overrepresented	14.6466	aldo-keto reductase (NADP) activity
GO:0008083	24	1	0.121806	Overrepresented	14.6466	growth factor activity
GO:0004407	27	1	0.137032	Overrepresented	16.3558	histone deacetylase activity
GO:0008429	27	1	0.137032	Overrepresented	16.3558	phosphatidylethanolamine binding
GO:0016810	28	1	0.142107	Overrepresented	16.9198	hydrolase activity, acting on carbon-nitrogen (but not peptide) bonds
GO:0009927	29	1	0.147183	Overrepresented	17.4809	histidine phosphotransfer kinase activity
GO:0016798	129	2	0.654709	Overrepresented	17.7529	hydrolase activity, acting on glycosyl bonds
GO:0003824	2676	8	13.5814	Underrepresented	20.6839	catalytic activity
GO:0004970	37	1	0.187785	Overrepresented	21.8695	ionotropic glutamate receptor activity
GO:0005234	37	1	0.187785	Overrepresented	21.8695	extracellular-glutamate-gated ion channel activity
GO:0016207	37	1	0.187785	Overrepresented	21.8695	4-coumarate-CoA ligase activity
GO:0008408	41	1	0.208086	Overrepresented	23.9982	3'-5' exonuclease activity
GO:0044212	43	1	0.218236	Overrepresented	25.0465	transcription regulatory region DNA binding
GO:0008565	171	2	0.867871	Overrepresented	27.3929	protein transporter activity
GO:0004540	48	1	0.243613	Overrepresented	27.6215	ribonuclease activity
GO:0004721	48	1	0.243613	Overrepresented	27.6215	phosphoprotein phosphatase activity
GO:0051539	53	1	0.268989	Overrepresented	30.1322	4 iron, 4 sulfur cluster binding
GO:0004675	54	1	0.274064	Overrepresented	30.6268	transmembrane receptor protein serine/threonine kinase activity
GO:0042393	55	1	0.27914	Overrepresented	31.1189	histone binding
GO:0016760	56	1	0.284215	Overrepresented	31.6085	cellulose synthase (UDP-forming) activity
GO:0008378	58	1	0.294365	Overrepresented	32.5803	galactosyltransferase activity
GO:0015020	58	1	0.294365	Overrepresented	32.5803	glucuronosyltransferase activity
GO:0016818	59	1	0.299441	Overrepresented	33.0625	hydrolase activity, acting on acid anhydrides, in phosphorus-containing anhydrides
GO:0043424	64	1	0.324817	Overrepresented	35.4375	protein histidine kinase binding
GO:0005506	711	1	3.60851	Underrepresented	35.5531	iron ion binding
GO:0004843	69	1	0.350193	Overrepresented	37.7533	ubiquitin-specific protease activity
GO:0003682	70	1	0.355269	Overrepresented	38.2095	chromatin binding
GO:0005484	72	1	0.365419	Overrepresented	39.1149	SNAP receptor activity
GO:0016597	72	1	0.365419	Overrepresented	39.1149	amino acid binding
GO:0004693	73	1	0.370494	Overrepresented	39.5642	cyclin-dependent protein serine/threonine kinase activity
GO:0046873	73	1	0.370494	Overrepresented	39.5642	metal ion transmembrane transporter activity
GO:0005515	4182	16	21.2248	Underrepresented	39.6638	protein binding
GO:0016759	74	1	0.37557	Overrepresented	40.0113	cellulose synthase activity
GO:0004601	237	2	1.20284	Overrepresented	43.0736	peroxidase activity
GO:0016757	955	7	4.84688	Overrepresented	44.6391	transferase activity, transferring glycosyl groups
GO:0019901	86	1	0.436473	Overrepresented	45.2032	protein kinase binding
GO:0004221	87	1	0.441548	Overrepresented	45.6218	ubiquitin thiolesterase activity
GO:0004871	256	2	1.29927	Overrepresented	47.495	signal transducer activity
GO:0016747	260	2	1.31957	Overrepresented	48.4145	transferase activity, transferring acyl groups other than amino-acyl groups
GO:0030145	95	1	0.48215	Overrepresented	48.8956	manganese ion binding
GO:0000166	2506	9	12.7186	Underrepresented	49.5232	nucleotide binding
GO:0016298	105	1	0.532903	Overrepresented	52.8061	lipase activity
GO:0003755	116	1	0.588731	Overrepresented	56.8852	peptidyl-prolyl cis-trans isomerase activity
GO:0046982	118	1	0.598881	Overrepresented	57.6028	protein heterodimerization activity
GO:0003676	1718	6	8.71931	Underrepresented	62.4558	nucleic acid binding
GO:0005516	483	1	2.45135	Underrepresented	67.4512	calmodulin binding
GO:0005525	495	1	2.51226	Underrepresented	67.4803	GTP binding
GO:0016705	503	1	2.55286	Underrepresented	67.5439	oxidoreductase activity, acting on paired donors, with incorporation or reduction of molecular oxygen
GO:0005509	539	1	2.73557	Underrepresented	68.2344	calcium ion binding
GO:0003700	3846	22	19.5195	Overrepresented	71.3181	sequence-specific DNA binding transcription factor activity
GO:0050662	164	1	0.832344	Overrepresented	72.2539	coenzyme binding
GO:0017111	672	4	3.41058	Overrepresented	75.0638	nucleoside-triphosphatase activity
GO:0022857	177	1	0.898322	Overrepresented	75.8129	transmembrane transporter activity
GO:0020037	750	2	3.80645	Underrepresented	76.5452	heme binding
GO:0003777	184	1	0.933849	Overrepresented	77.6346	microtubule motor activity
GO:0004190	187	1	0.949075	Overrepresented	78.3957	aspartic-type endopeptidase activity
GO:0005215	955	3	4.84688	Underrepresented	82.0328	transporter activity
GO:0003677	3934	17	19.9661	Underrepresented	82.2062	DNA binding
GO:0031072	282	2	1.43123	Overrepresented	84.0036	heat shock protein binding
GO:0016740	298	2	1.51243	Overrepresented	85.1294	transferase activity
GO:0004386	300	2	1.52258	Overrepresented	85.2771	helicase activity
GO:0016758	408	1	2.07071	Underrepresented	93.2015	transferase activity, transferring hexosyl groups
GO:0004553	546	3	2.7711	Overrepresented	97.017	hydrolase activity, hydrolyzing O-glycosyl compounds
GO:0016887	585	3	2.96903	Overrepresented	98.816	ATPase activity
GO:0004842	619	2	3.14159	Underrepresented	99.205	ubiquitin-protein ligase activity
GO:0016787	729	4	3.69987	Overrepresented	101.047	hydrolase activity
GO:0008270	3032	16	15.3882	Overrepresented	101.557	zinc ion binding
GO:0043565	887	5	4.50176	Overrepresented	103.467	sequence-specific DNA binding
GO:0003735	733	3	3.72017	Underrepresented	128	structural constituent of ribosome
GO:0004091	297	1	1.50735	Underrepresented	128	carboxylesterase activity
GO:0004722	282	1	1.43123	Underrepresented	128	protein serine/threonine phosphatase activity
GO:0005507	534	2	2.71019	Underrepresented	128	copper ion binding
GO:0016788	372	1	1.888	Underrepresented	128	hydrolase activity, acting on ester bonds
GO:0042626	248	1	1.25867	Underrepresented	128	ATPase activity, coupled to transmembrane movement of substances
GO:0046983	740	3	3.7557	Underrepresented	128	protein dimerization activity
GO:0051082	257	1	1.30434	Underrepresented	128	unfolded protein binding
