# Supplementary material for: Novel QTL for Low Seed Cadmium Accumulation in Soybean
Source: Plants (Basel). 2022 Apr 24;11(9):1146. doi: 10.3390/plants11091146 (PMC9102923; doi:10.3390/plants11091146)
Supplement: Supplementary file 1 [file plants-11-01146-s001.zip › Supplemental File S2.xlsm]

## Sheet: Sheet1
Supplementary Table 1. Soybean varieties used for KASP marker for Cda1 screening using HEX and FAM fluorescent fluorophores								Novel QTL for Low Seed Cadmium Accumulation in Soybean Nour Nissan1,2, Julia Hooker1,2, Arezo Pattang1,2, Martin Charette1, Malcolm Morrison1, Kangfu Yu3, Anfu Hou4, Ashkan Golshani2, Stephen J. Molnar1, Elroy R. Cober1, Bahram Samanfar1,2* 1 Agriculture and Agri-Food Canada, Ottawa Research and Development Centre, Ottawa, ON, Canada. 2Department of Biology and Ottawa Institute of Systems Biology…
Plate location	Name	Call	FAM	HEX
A01	ctl-	4	0.490571	0.910296
A02	ctl-	4	0.497765	0.914541
A03	9004	3	2.83694	0.988493				Supplementary Table 2. KASP primer designed and used in this study for Cda1
A04	9063	3	2.80982	0.994866				Assays ID	Primer Seq Allele X	Primer Seq Allele Y	Primer Seq common	FAM Allele	HEX Allele
A05	0702-11	7						Cda1	GACATCGGTATCTCAATGGG	AGCTGACATCGGTATCTCAATGGA	GTTTCATTTGCAAGAGCTGAACCTGATAT	G	A
A06	08P661	3	2.81518	0.997575
A07	22-60RY	3	2.85451	0.993949
A08	23-11RY	3	2.81366	0.993326
A09	840-7-3	3	2.85918	0.992246
A10	90A01	1	1.32561	1.79768
A11	AAC Dale	3	2.85046	1.00981
A12	AAC Edward	1	1.23858	1.56093
A13	AAC Hensatto	3	2.83337	0.997578
A14	AAC Hoshi	3	2.83043	1.01844
A15	AAC Invest1605	1	1.35341	1.79612
A16	AAC Malden	3	2.83686	1.02433
A17	AAC Malika	3	2.91569	1.02108
A18	AAC Mandor	3	2.86466	1.02498
A19	AAC Naruto	3	2.86489	1.02913
A20	AAC Shinju	3	2.87276	1.03235
A21	AAC Springfield	1	1.39607	1.81307
A22	AAC Stern	3	2.89407	1.07434
A23	AAC Umami	1	1.44314	1.82423
A24	AAC Vireo	1	1.463	1.80456
C01	AAC Zaurak	1	1.36869	1.72022
C02	AAC Halli	1	1.32215	1.76507
C03	AC 2001	1	1.11867	1.52676
C04	AC Brant	3	2.74567	0.993572
C05	AC COLIBRI	3	2.7998	0.97479
C06	AC Harmony	3	2.74279	0.989406
C07	AC Hercule	1	1.36602	1.74769
C08	AC HIME	1	1.31436	1.768
C09	AC Orford	3	2.77146	0.981919
C10	AC Proteus	1	1.35632	1.7146
C11	Alta	7
C12	AMSOY 71	3	2.71622	0.993815
C13	Bloomfield	3	2.7728	0.980568
C14	Chikala	3	2.78292	1.00897
C15	COLBY	3	2.84221	1.00986
C16	CONRAD 94	3	2.7779	1.00107
C17	CROWN	3	2.84341	1.0159
C18	Dowling	3	2.52606	1.05189
C19	Dundas	1	1.40481	1.80238
C20	e1665	3	2.60149	0.994527
C21	e2062	3	2.87338	1.01745
C22	Fjord	1	1.42504	1.88534
C23	Fuku Yutaka	3	2.92079	1.03757
C24	Gaillard	3	2.86097	1.05152
E01	Harosoy	1	1.38272	1.74659
E02	Hayahikari	3	2.7779	0.989929
E03	Heather	1	1.38384	1.70136
E04	Jackson	3	1.61274	0.935612
E05	Jari	1	1.39102	1.68315
E06	KG20	1	1.3603	1.73061
E07	MANDARIN	1	1.35943	1.68217
E08	Maple Arrow	1	1.33875	1.7265
E09	Maple Donovan	2	2.21436	1.30969
E10	Maple Presto	1	1.34796	1.73058
E11	Maple Ridge	1	1.35118	1.73195
E12	Medallion	1	1.33742	1.65212
E13	Misty	3	2.8465	0.994677
E14	Montcalm	3	2.57412	0.977176
E15	Natosan	1	1.49075	1.67414
E16	OAC Ayton	2	2.15025	1.42617
E17	OAC Eramosa	1	1.37311	1.79697
E18	OAC Lakeview	3	2.79038	1.00429
E19	OAC Marvel	3	2.87394	1.01223
E20	OAC Morden	3	2.81337	1.01
E21	OAC Morris	1	1.43641	1.81706
E22	OAC Oxford	3	2.78936	1.00149
E23	OAC Petrel	1	1.38859	1.72676
E24	OAC Prosper	3	2.85771	1.03903
G01	OAC Prudence	1	1.34263	1.74101
G02	OAC Thames	1	1.36749	1.72318
G03	OAC Vision	1	1.32137	1.75263
G04	OAC Wallace	3	2.74617	0.996749
G05	OAC Walton	1	1.35338	1.69194
G06	OT02-13	3	2.72383	0.980578
G07	OT02-18	1	1.39492	1.66296
G08	OT03-16	3	2.79313	0.983761
G09	OT04-12	3	2.55097	0.943761
G10	OT11-01	1	1.36262	1.75318
G11	OT13-08	1	1.32108	1.70694
G12	OT15-05	3	2.82656	1.00714
G13	OT16-01	1	1.33786	1.73219
G14	OT16-06	3	2.77107	1.01425
G15	OT17-01	3	2.8384	0.997049
G16	OT17-02	3	2.85353	1.01101
G17	OT17-03	1	1.34942	1.73666
G18	OT18-01	3	2.80677	1.02741
G19	OT18-02	3	2.87342	1.01458
G20	OT18-03	1	1.33915	1.80211
G21	OT18-09	3	2.93315	1.06049
G22	OT18-10	1	1.34389	1.85711
G23	OT18-11	1	1.39956	1.85602
G24	OT18-12	1	1.31848	1.91712
I01	OT18-13	1	1.36543	1.75411
I02	OT18-14	3	2.7668	0.981142
I03	OT18-17	3	2.73821	0.962483
I04	OT18-18	3	2.81824	0.996588
I05	OT19-01	3	2.73676	0.983616
I06	OT19-02	3	2.70694	0.99608
I07	OT19-03	3	2.75682	0.985563
I08	OT19-04	3	2.76011	0.97767
I09	OT19-05	3	2.79635	0.980996
I10	OT19-06	3	2.74889	0.989245
I11	OT19-07	3	2.80251	0.968793
I12	OT19-08	3	2.77202	1.00633
I13	OT19-09	3	2.82022	0.976358
I14	OT19-10	3	2.78899	1.00485
I15	OT89-17	7
I16	OT90-18	1	1.34667	1.82466
I17	OT91-3	3	2.85296	1.00197
I18	OT98-17	3	2.7723	0.99153
I19	OT99-17	1	1.32253	1.78226
I20	OX151	3	2.8077	1.0265
I21	OX152	3	2.82377	0.991557
I22	Palmato	3	2.80826	1.01394
I23	PANDO	3	2.77905	0.991451
I24	PARANA	1	1.3191	1.86831
K01	PARANA JOIANA	1	1.34138	1.68254
K02	PI159925	3	2.80399	0.988348
K03	PI180521	1	1.36913	1.67812
K04	PI257429	3	2.76513	0.980118
K05	PI360962	3	2.83385	0.981222
K06	PI406684	3	2.81149	0.983678
K07	PI406884	3	2.82509	0.980458
K08	PI423992	3	2.77011	0.993632
K09	PI437313	3	2.82652	0.995506
K10	PI445826	1	1.27968	1.83592
K11	PI449456 A	1	1.32504	1.78413
K12	PI458535	3	2.78062	0.985165
K13	PI464867	3	2.83696	0.988288
K14	PI464870	3	2.78436	0.9924
K15	PI507757	3	2.82295	0.975208
K16	PI507761	3	2.79734	1.01231
K17	PI514674	3	2.80129	0.989867
K18	PI522184	3	2.87138	1.02148
K19	PI547409 DT2	3	2.85478	1.00816
K20	PI547681 DT2	1	1.3395	1.82649
K21	PI547833 DT2	3	2.90094	1.02917
K22	PI591487 dt1-t	3	2.89026	1.03777
K23	PI591488 dt1	3	2.90692	1.02622
K24	PI593983	7
M01	Portage	1	1.51232	1.67863
M02	RCAT BOBCAT	3	2.84958	0.985579
M03	RD 714	1	1.35486	1.67173
M04	Ridge	1	1.37178	1.72855
M05	Rodeo	3	2.81699	0.96412
M06	Rolland	2	2.00962	1.46533
M07	Roselin	3	2.83605	0.979474
M08	S19-90	1	1.33496	1.78086
M09	SC 2216N	3	2.8431	0.984168
M10	SC 3116N	1	1.35689	1.7488
M11	Supra	1	1.3463	1.79303
M12	Suzuhime	3	2.85431	0.970245
M13	Toky	1	1.38713	1.74244
M14	Toyohakura	3	2.83969	1.01142
M15	Toyohomare	3	2.8592	0.980515
M16	Toyomizuki	3	2.75149	0.985071
M17	Westag 97	3	2.86519	0.989735
M18	Williams 82	3	2.83279	1.0155
M19	X3145 ORIGINAL	3	2.85827	0.991431
M20	X5063-39	1	1.34638	1.80309
M21	Yukihomare-R	3	2.9031	1.00757
M22	ctl-	4	0.500264	0.937203
M23	Yukishizuka	3	2.57396	0.974807
M24	Yukipirika	3	2.90552	1.02009
