# Supplementary material for: Novel QTL for Low Seed Cadmium Accumulation in Soybean
Source: Plants (Basel). 2022 Apr 24;11(9):1146. doi: 10.3390/plants11091146 (PMC9102923; doi:10.3390/plants11091146)
Supplement: Supplementary file 1 [file plants-11-01146-s001.zip › Supplementary File S3.xlsx]

## Sheet: X4050
Novel QTL for Low Seed Cadmium Accumulation in Soybean Nour Nissan1,2, Julia Hooker1,2, Arezo Pattang1,2, Martin Charette1, Malcolm Morrison1, Kangfu Yu3, Anfu Hou4, Ashkan Golshani2, Stephen J. Molnar1, Elroy R. Cober1, Bahram Samanfar1,2* 1 Agriculture and Agri-Food Canada, Ottawa Research and Development Centre, Ottawa, ON, Canada. 2Department of Biology and Ottawa Institute of Systems Biology…
Supplementary Table 1. Polymorphic SSR markers used for F4 derived population X4050 QTL analysis, including their linkage group, position and Tm
SSR	Lkg	Position	Tm
AB002807	I	35.2	64
AF162283	G	87.94	60
AW132402	A2	67.86	64
AW310961	J	5.061	54
AW756935	F	124.87	56
AZ254740	G	8.233	56
AZ536570	A1	31.39	59
BE820148	A2	35.93	58
GMSC514	M	3.05	52
GS2-19F/GS316R	F		52
Sat_022	D2	120.3	51
Sat_033	N	58.4	56
Sat_042	C1	82.5	51
Sat_043	K	61.67	51
Sat_044	K	58	56
Sat_062	C2	30.8	57
Sat_064	G	89.3	51
Sat_071	L	20.78	46
Sat_074	F	142.35	56
Sat_085	C1	76.9	50
Sat_087	K	4.85	56
Sat_088	G	58	47
Sat_090	F	130.64	46
Sat_091	N	79.5	54
Sat_094	G	56.18	50
Sat_096	D1b	0	58
Sat_097	A2	122	46
Sat_099	L	78.23	50
Sat_106	D1a	66.38	54
Sat_108	O	129.3	58
Sat_112	E	8.64	50
Sat_115	A2	81	53
Sat_119	K	17.11	55
Sat_124	E	15.85	56
Sat_125	N	103.64	48
Sat_126	K	108.2	48
Sat_127	H	28.8	48
Sat_128	B1	53.4	59
Sat_136	E	39.16	54
Sat_140	C1	41.42	56
Sat_149	B1	54	62
Sat_150	L	53.67	58
Sat_156	B1	34.99	58
Sat_162	A2	51.9	56
Sat_163	G	10.06	60
Sat_170	I	75	58
Sat_174	I	36.6	58
Sat_197	F	103.5	56
Sat_198	D1b	119	58
Sat_219	I	36.03	64
Sat_224	J	75.32	56
Sat_227	D1b	11.14	60
Sat_235	C1	94.6	60
Sat_245	L	115.07	58
Sat_255	J	43.95	60
Sat_261	B1	32.95	56
Sat_270	B1	21.99	66
Sat_286	L	87.42	62
Sat_289	D1b	131.9	58
Sat_290	G	29.02	60
Sat_293	K	99.1	54
Sat_305	D1a	91.26	56
Sat_305	D1a	91.26	56
Sat_316	M	21	58
Sat_332	D1a	5.2	58
Sat_334	H	59	58
Sat_350	J	55.73	58
Sat_353	D1a	36.2	61
Sat_355	B2	66.24	62
Sat_372	G	107.75	60
Sat_376	E	69.2	60
Sat_378	A2	116.62	62
Sat_383	A2	0	56
Sat_411	B1	30.87	56
Sat_K_147	K		47
Satg001	D1b	137.97	56
Satt_K_115	K		47
Satt001	K	50.56	53
Satt020	B2	72.1	46
Satt031	D2	115.7	50
Satt049	I	58.8	50
Satt055	K	33	54
Satt066	B2	78.84	55
Satt070	B2	72.8	46
Satt076	L	61.35	46
Satt077	D1a	77.5	42
Satt080	N	45.14	46
Satt089	A2	87.56	56
Satt095	D1b	25.6	55
Satt114	F	63.69	50
Satt125	N	40.63	60
Satt125	N	40.63	40
Satt129	D1a+Q	11.22	56
Satt138	G	55.8	52
Satt142	H	86.48	54
Satt143	L	30.19	52
Satt146	F	1.9	56
Satt147	D1a	108.8	53
Satt148	I	100.78	60
Satt150	M	18.58	57
Satt152	N	22.67	61
Satt155	A1	32.67	56
Satt157	D1b	37.07	58
Satt162	I	86.84	52
Satt164	C1	132.5	58.5
Satt165	A1	23	50
Satt166	L	65.5	50
Satt167	K	45.7	58
Satt168	B2	55.2	54
Satt173	O	58.4	50
Satt174	A1	88.57	49
Satt181	H	91.11	49
Satt184	D1a	17.5	47
Satt186	D2	105.45	57
Satt192	H	44.04	52
Satt194	C1	26.35	56
Satt196	K	104.79	61
Satt200	A1	92.89	53
Satt202	C2	126.23	58
Satt204	E	43.14	60
Satt207	A2	26.5	62
Satt213	E	3.7	42
Satt216	D1b+W		56
Satt218	F	111.06	56
Satt220	M	56.3	56
Satt229	L	93.88	57
Satt233	A2	100.1	48
Satt234	N	84.6	50
Satt235	G	21.89	60
Satt236	A1	93.23	56
Satt240	K	52.88	50
Satt243	O	119.5	58
Satt244	J	64.86	61
Satt245	M	53.54	57
Satt251	B1	36.48	54
Satt259	O	39.81	63
Satt260	K	80.19	60
Satt268	E	44.27	54
Satt270	I	50.11	56
Satt273	K	56.62	61
Satt276	A1	17.16	60
Satt277	C2	107.6	63
Satt282	D1b	76.1	54
Satt285	J	25.5	52
Satt287	J	15.73	57
Satt288	G	76.77	61
Satt292	I	82.77	54
Satt295	D1A	55.2	58
Satt298	B1	64.91	58
Satt300	A1	30.93	60
Satt311	D2	84.62	57
Satt313	L	34.54	53
Satt326	K	49.52	57
Satt327	A2	109.83	54
Satt332	B1	80.89	62
Satt334	F	84.6	59
Satt335	F	77.7	53
Satt336	M	133.8	50
Satt341	A2	77.7	64
Satt353	H	8.48	63
Satt354	I	46.22	57
Satt355	E	45.1	60
Satt358	O	5.4	59
Satt359	B1	102.56	50
Satt363	C2	98.1	60
Satt371	C2	145.5	58
Satt372	D2	39.3	60
Satt384	E	19.3	60
Satt386	D2	125	66
Satt389	D2	79.23	60
Satt396	C1	21.1	54
Satt397	D2	69.3	56
Satt398	L	30.58	64
Satt402	D1a	63.134	56
Satt403	E	44.9	56
Satt406	J	36.66	52
Satt409	A2	145.7	54
Satt411	E	12.92	56
Satt412	D1b	72.57	54
Satt413	D2	113.6	54
Satt415	B1	82.89	58
Satt416	B2	56.96	61
Satt419	I	21.9	63
Satt424	A2	60.58	54
Satt426	B1	28.3	62
Satt427	G	51.69	55
Satt428	D1b	77.35	58
Satt429	A2	162	54
Satt437	A2	107.05	64
Satt451	I	20.33	60
Satt453	B1	123.9	57
Satt458	D2	24.51	64
Satt474	B2	75.35	60
Satt475	K	78	58
Satt477	O	82.09	65
Satt478	O	71.1	57
Satt479	O	54.2	50
Satt480	A2	28.44	58
Satt481	L	54.57	58
Satt482	D1a	45.7	59
Satt487	O	9.526	50
Satt490	F	97.966	58
Satt496	I	36.4	64
Satt497	L	33.7	61
Satt499	K	71	63
Satt507	D1a	56.37	62
Satt509	B1	32.51	62
Satt510	F	71.4	53
Satt513	L	106.37	62
Satt516	F	44.42	53
Satt517	G	69.87	50
Satt520	C2	42.36	47
Satt521	N	65.5	50
Satt522	F	119.18	52
Satt524	C1	120	50
Satt530	N	32.85	51
Satt534	B2	87.59	51.6
Satt540	M	35.9	56
Satt542	D1b	53	58
Satt547	J	67.74	57
Satt548	D1a	69.81	57
Satt549	N	70.6	59
Satt551	M	95.5	52
Satt559	K	55	55
Satt560	B2	97.92	56
Satt561	L	71.44	47
Satt562	I	22.84	58
Satt567	M	33.47	60
Satt568	H	27.64	53
Satt569	F	3.35	60
Satt570	G	12.74	60
Satt574	D2	87.6	54
Satt575	E	3.3	47
Satt576	O	55.8	60
Satt584	N	37.98	58
Satt587	I	31.5	52
Satt588	K	117	58
Satt589	A2	34	58
Satt590	M	7.84	56
Satt592	O	100.37	58
Satt595	F	50.24	56
Satt596	J	39.77	47
Satt599	A1	85.58	56
Satt601	B2	67.73	58
Satt602	E	41.68	60
Satt612	G	80.38	58
Satt614	I	24.61	63
Satt615	D2	91.21	60
Satt617	K	50.94	58
Satt623	I	92.52	60
Satt629	H	72.17	58
Satt633	O	56.93	54
Satt635	H	4.88	56
Satt638	B1	37.8	60
Satt643	C2	94.65	48
Satt651	E	32.1	60
Satt657	F	116.9	56
Satt663	F	56.17	56
Satt665	B1	96.366	60
Satt669	D2	67.7	60
Satt670	C1	85.37	52
Satt681	C2	3.15	57
Satt684	A1	3.54	56
Satt685	E	56.7	60
Satt691	E	19.7	58
Satt693	J	33.91	54
Satt699	E	41.2	56
Satt703	D1b	98.75	60
Satt706	E	43.4	58
Satt713	C1	88.95	58
Satt716	E	45.63	60
Satt720	E	20.8	56
Satt723	L	1.1	60
Sct_001	J	44.78	52
Sct_010	L	59.52	44
Sct_026	B1	78.13	46
Sct_137	D2	128.95	46
Sct_190	K	77.37	56
Sct_192	D2	11.77	60
Sctt009	H	38.89	44

## Sheet: X5154
Supplementary Table 2. Polymorphic SSR markers used for F4 dervied population X5154 QTL analysis, including their linkage group, position and Tm
SSR	LKG	Position	Tm
AB002807	I	35.1	56
AF132283	G	88	60
AF186183	M	77.24	60
Ai798421	C1	122.62	58
Ai856415	D1b	50.1	56
AW277661	C1	74.79	64
AW310961	J	5.1	52
AW620774	B2	90.3	45
AW734043	C2	4.2	58
AZ302047	D1a	63.126	56
BE347343	E	65.66	54
BE801538	B1	126.51	56
BF008905	O	29.1	58
GMLPSI2	I	97.05	42
JapCad1	K	26	58
JapCad2	K	26	58
Saat_K_150	K	25	47
Sat_022	D2	120.3	54
Sat_038	O	112.16	50
Sat_039	F	27.87	50
Sat_042	C1	82.5	52
Sat_044	K	58	53
Sat_069	D1b	102.6	44
Sat_092	D2	57.5	44
Sat_093	J	46.37	54
Sat_096	D1b	0	60
Sat_105	I	49.34	56
Sat_108	O	129.3	54
Sat_109	O	127.5	48
Sat_115	A2	81	52
Sat_117	G	100	48
Sat_118	H	61.9	48
Sat_119	K	17.1	54
Sat_121	M	103.98	60
Sat_129	A2	84.07	54
Sat_130	C2	11.4	56
Sat_131	G	31.3	56
Sat_134	L	28.27	55
Sat_136	E	39.2	46
Sat_139	D1b	93.3	46
Sat_140	C1	41.4	60
Sat_149	B1	54	62
Sat_153	C2	62	58
Sat_156	B1	34.99	58
Sat_167	K	85.18	52
Sat_170	I	75	56
Sat_183	D1b	112.6	56
Sat_196	O	0	60
Sat_199	A2	84.1	46
Sat_207	C1	87.3	50
Sat_213	C2	90.93	56
Sat_218	H	99.5	56
Sat_220	D2	128.73	60
Sat_224	J	75.3	60
Sat_227	D1b	11.139	60
Sat_228	J	23.92	46
Sat_233	A2	86.4	44
Sat_234	F	66.5	60
Sat_235	C1	94.6	56
Sat_236	N	57.6	46
Sat_241	N	89.38	56
Sat_242	O	74.05	46
Sat_243	K	86.8	60
Sat_247	B1	49.73	46
Sat_250	A2	105.2	54
Sat_260	G	61.41	52
Sat_261	B1	32.9	58
Sat_262	F	9.7	56
Sat_264	B2	12.558	58
Sat_267	A1	78.45	60
Sat_268	I	55.1	60
Sat_270	B1	21.99	56
Sat_272	B1	14.3	54
Sat_273	E	47.5	46
Sat_274	O	107.58	60
Sat_275	N	40.8	50
Sat_276	M	128.5	58
Sat_282	O	63.81	60
Sat_286	L	87.42	62
Sat_287	B2	31.8	56
Sat_289	D1b	131.917	60
Sat_290	G	29.02	58
Sat_292	D2	75.23	50
Sat_293	K	99.1	58
Sat_294	A2	131.97	58
Sat_296	D2	6.42	62
Sat_297	F	60	60
Sat_305	D1a	29.6	50
Sat_307	O	123.43	60
Sat_308	G	43.1	62
Sat_309	F	41.5	46
Sat_311	C1	90.1	56
Sat_316	M	21	60
Sat_330	M	140.7	60
Sat_332	D1a	5.6	58
Sat_337	C1	32.1	60
Sat_339	J	27.98	56
Sat_342	B2	20.3	46
Sat_344	A1	19.37	46
Sat_348	B1	72	56
Sat_352	K	93.64	60
Sat_355	B2	66.24	46
Sat_356	A1	42.8	60
Sat_368	A1	14.4	60
Sat_372	G	107.74	60
Sat_373	D1B	35.7	46
Sat_382	A2	116.41	60
Sat_383	A2	0	58
Sat_384	A1	31.1	46
Sat_402	C2	103.33	60
Sat_403	G	34.9	56
Sat_406	A2	25.9	58
Sat_407	A1	52.321	58
Sat_414	D1a	35.4	58
Sat_422	M	80.97	46
Sat_423	D1b	67.63	50
Sat_K_139	K	25	47
Sat_K_147	K	25	47
Satcc001	K	25	55
Satt_K_115	K	25	47
Satt005	D1B	75.3	46
Satt030	F	3.9	44
Satt038	G	1.8	56
Satt041	D1b	84.04	46
Satt052	H	64.1	46
Satt055	K	32.95	48
Satt063	B2	93.49	46
Satt066	B2	78.8	46
Satt077	D1a	77.5	42
Satt080	N	45.137	46
Satt089	A2	87.56	46
Satt115	G	43.78	44
Satt126	B2	27.6	50
Satt129	D1a	109.7	54
Satt135	D2	26.05	46
Satt138	G	55.98	54
Satt146	F	1.9	55
Satt148	I	100.08	58
Satt152	N	22.7	56
Satt154	D2	57.07	56
Satt164	C1	134.45	50
Satt165	A1	22.996	50
Satt166	L	66.5	50
Satt167	K	45.7	58
Satt177	A2	36.77	50
Satt180	C1	127.8	40
Satt184	D1a	17.5	46
Satt186	D2	105.45	50
Satt194	C1	26.4	50
Satt196	K	104.79	62
Satt197	B1	46.4	43
Satt200	A1	92.88	56
Satt204	E	43.14	60
Satt210	M	112.1	52
Satt218	F	117.64	56
Satt222	H	68.08	60
Satt232	L	10.35	60
Satt240	K	52.9	54
Satt244	J	64.85	44
Satt245	M	53.54	58
Satt257	N	92.558	52
Satt259	O	39.8	58
Satt260	K	80.1	60
Satt270	I	50.1	56
Satt272	B2	71.67	54
Satt274	D1b	116.35	60
Satt276	A1	17.16	58
Satt278	L		56
Satt281	C2	40.23	60
Satt282	D1B	76.1	52
Satt285	J	25.5	52
Satt286	C2	101.75	62
Satt291	C2	70.2	56
Satt294	C1	78.06	56
Satt301	D2	93.71	60
Satt302	H	81.04	60
Satt304	B2	65.55	46
Satt305	C2	69.665	52
Satt308	M	130.75	56
Satt309	G	4.5	60
Satt311	D2	84.6	60
Satt316	C2	127.67	52
Satt318	B2	70.12	60
Satt320	D1a	74.1	58
Satt321	D1a	70.72	60
Satt322	C2	82.2	44
Satt329	A2	110.9	58
Satt333	A2	119.59	60
Satt334	F	78.05	60
Satt336	M	133.8	50
Satt338	C1	123.8	56
Satt339	N	75.9	56
Satt341	A2	77.7	60
Satt349	K	42.39	60
Satt352	G	50.527	54
Satt359	B1	102.56	50
Satt369	E	56.27	62
Satt372	D2	39.3	58
Satt380	J	43.11	60
Satt385	A1	64.74	48
Satt386	D2	125	60
Satt388	L	23.54	60
Satt398	L	30.58	50
Satt399	C1	76.23	58
Satt403	E	44.9	56
Satt406	J	36.66	56
Satt415	B1	82.9	50
Satt416	B2	56.96	60
Satt422	C2	44.662	60
Satt426	B1	28.32	62
Satt427	G	51.689	60
Satt428	D1b	77.3	58
Satt432	C2	38.04	20
Satt434	H	105.74	56
Satt440	I	112.7	50
Satt442	H	46.9	50
Satt444	B1	85.9	50
Satt445	O	20.4	52
Satt448	L	64.66	56
Satt449	A1	27.8	56
Satt452	E	45.1	56
Satt457	C2	56.51	52
Satt463	M	60	58
Satt471	A1	28	46
Satt472	G	94.84	60
Satt473	O	52.11	60
Satt476	C1	80.623	57
Satt478	O	71.1	48
Satt484	B1	118.53	60
Satt487	O	9.53	50
Satt492	O	17.25	52
Satt499	K	71	58
Satt500	O	14.17	56
Satt504	G	59.83	60
Satt507	D1a	56.36	56
Satt509	B1	32.5	52
Satt510	F	71.41	52
Satt511	A1	94.2	56
Satt514	D2	85.68	60
Satt516	F	44.42	52
Satt517	G	69.87	50
Satt520	C2	42.36	44
Satt521	N	65.457	58
Satt522	F	119.18	52
Satt524	C1	120.1	56
Satt530	N	32.84	51
Satt531	D1a	80.018	54
Satt534	B2	87.592	51
Satt537	D1b	75.674	58
Satt540	M	35.9	56
Satt541	H	53.35	56
Satt542	D1b	53.02	52
Satt544	K	43.347	56
Satt556	B2	73.213	56
Satt557	C2	112.189	54
Satt562	I	22.8	56
Satt565	C1	0	40
Satt568	H	27.63	56
Satt569	F	3.4	60
Satt571	I	18.5	56
Satt572	A1	14.7	56
Satt576	O	55.81	56
Satt577	B2	6.05	58
Satt587	I	31.49	56
Satt588	K	117.02	56
Satt589	A2	33.95	56
Satt590	M	7.8	54
Satt593	A1	25.56	56
Satt601	B2	67.73	58
Satt606	E	39.779	54
Satt607	C1	67	58
Satt610	G	10.9	54
Satt611	D1b	74.02	58
Satt612	G	80.38	58
Satt614	I	31.938	60
Satt619	A1	69.2	60
Satt624	N	35.32	64
Satt629	H	72.2	58
Satt631	N	26.13	60
Satt633	O	56.93	56
Satt634	D1b	46.6	56
Satt635	H	4.88	56
Satt637	H	85.79	60
Satt638	B1	37.799	60
Satt640	C2	30.47	52
Satt643	C2	94.64	56
Satt649	F	5.36	54
Satt653	O	38	58
Satt655	M	76.41	54
Satt659	F	26.7	60
Satt663	F	56.17	60
Satt665	B1	96.35	60
Satt666	H	0.59	54
Satt669	D2	67.71	60
Satt671	I	72.094	50
Satt672	D2	114.966	60
Satt673	K	50.8	52
Satt675	N	34.65	58
Satt676	H	68.85	56
Satt677	M	75.57	56
Satt681	C2	3.15	57
Satt682	C1	127.06	60
Satt684	A1	3.5	60
Satt686	J	40.67	60
Satt687	B2	113.61	52
Satt688	G	12.5	58
Satt690	C1	5.35	54
Satt691	E	19.69	58
Satt698	D1B	38.04	58
Satt699	E	41.24	46
Satt708	C2	115.5	58
Satt713	C1	89	58
Satt715	K	1	58
Satt716	E	45.62	60
Satt718	C1	73.8	56
Satt727	K	46.8	50
Sct_026	B1	78.127	46
Sct_034	B2	51.5	50
Sct_190	K	77.4	58
Sct_195	N	2.4	56
SoyGPATR	C1	10.34	52
Soyhsp176	F	68.43	56
Staga001	C2	119.85	64
Stta001	K	27	55
X17120	C2	75.21	64
